1 **Differential regulation of mouse hippocampal gene expression sex differences by**  
2 **chromosomal content and gonadal sex**

3 **Authors:** Sarah R. Ocañas<sup>1,2</sup>, Victor A. Ansere<sup>1,2</sup>, Kyla B. Tooley<sup>1,2</sup>, Niran Hadad<sup>2</sup>, Ana J.  
4 Chucair-Elliott<sup>1</sup>, David R. Stanford<sup>1</sup>, Shannon Rice<sup>1</sup>, Benjamin Wronowski<sup>2</sup>, Jessica M.  
5 Hoffman<sup>3</sup>, Steven N. Austad<sup>3</sup>, Michael B. Stout<sup>4</sup>, Willard M. Freeman<sup>1,5\*</sup>

6 <sup>1</sup>Genes & Human Disease Program, Oklahoma Medical Research Foundation, Oklahoma City,  
7 OK USA, <sup>2</sup>Department of Physiology, University of Oklahoma Health Sciences Center,  
8 Oklahoma City, OK USA, <sup>3</sup>Department of Biology, The University of Alabama at Birmingham,  
9 Birmingham, AL USA, <sup>4</sup>Aging & Metabolism Disease Program, Oklahoma Medical Research  
10 Foundation, Oklahoma City, OK USA, <sup>5</sup>Oklahoma City Veterans Affairs Medical Center,  
11 Oklahoma City, OK USA

12 **To whom correspondence should be addressed:** \*Willard M. Freeman, Genes & Human  
13 Disease Program, Oklahoma Medical Research Foundation, 825 NE 13<sup>th</sup> Street, Oklahoma  
14 City, OK 73104, USA.

15 **Tel:** 405-271-3139

16 **Fax:** 405-271-2536

17 **E-mail address:** bill-freeman@omrf.org

18

19

20 **Acknowledgments:** This work was supported by grants from the National Institutes of  
21 Health (NIH) P30AG050911, R01AG059430, R56AG067754, T32AG052363,  
22 F31AG064861, P30EY021725, P30AG050886, R21AG058811, R01AG057434,  
23 R01AG070035, R01AG069742, Oklahoma Center for Adult Stem Cell Research  
24 (OCASCR), a program of the Oklahoma Tobacco Settlement Endowment Trust,  
25 BrightFocus Foundation (M2020207), and Presbyterian Health Foundation. This work  
26 was also supported in part by the MERIT award I01BX003906 and a Shared Equipment  
27 Evaluation Program (ShEEP) award ISIBX004797 from the United States (U.S.)  
28 Department of Veterans Affairs, Biomedical Laboratory Research and Development  
29 Service. The authors would also like to thank the Clinical Genomics Center (OMRF) for  
30 assistance and instrument usage.

31 **Abstract**

32 Sex differences in the brain as they relate to health and disease are often overlooked in  
33 experimental models. Many neurological disorders, like Alzheimer’s disease (AD), multiple  
34 sclerosis (MS), and autism, differ in prevalence between males and females. Sex differences  
35 originate either from differential gene expression on sex chromosomes or from hormonal  
36 differences, either directly or indirectly. To disentangle the relative contributions of genetic sex  
37 (XX v. XY) and gonadal sex (ovaries v. testes) to the regulation of hippocampal sex effects, we  
38 use the “sex-reversal” Four Core Genotype (FCG) mouse model which uncouples sex  
39 chromosome complement from gonadal sex. Transcriptomic and epigenomic analyses of  
40 hippocampal RNA and DNA from ~12 month old FCG mice, reveals differential regulatory effects  
41 of sex chromosome content and gonadal sex on X- versus autosome-encoded gene expression  
42 and DNA modification patterns. Gene expression and DNA methylation patterns on the X  
43 chromosome were driven primarily by sex chromosome content, not gonadal sex. The majority of  
44 DNA methylation changes involved hypermethylation in the XX genotypes (as compared to XY)  
45 in the CpG context, with the largest differences in CpG islands, promoters, and CTCF binding  
46 sites. Autosomal gene expression and DNA modifications demonstrated regulation by sex  
47 chromosome complement and gonadal sex. These data demonstrate the importance of sex  
48 chromosomes themselves, independent of hormonal status, in regulating hippocampal sex  
49 effects. Future studies will need to further interrogate specific CNS cell types, identify the  
50 mechanisms by which sex chromosome regulate autosomes, and differentiate organizational  
51 from activational hormonal effects.

52

53 **Keywords**

54 Sex effects, hippocampus, epigenome, transcriptome, four core genotype, sex chromosome,  
55 DNA methylation, X inactivation

## 56 **Introduction**

57 Sex is a major risk factor for many neurological diseases and disorders, including Alzheimer's  
58 disease (AD), multiple sclerosis, autism, attention-deficit/hyperactivity disorder (ADHD),  
59 depression, and age-related cognitive decline. Females tend to outperform males on  
60 hippocampal-dependent learning tasks and are more impacted by many diseases/disorders of  
61 hippocampal dysfunction (i.e. AD, depression)<sup>1</sup>. As the learning center of the brain, damage to  
62 the hippocampus leads to cognitive decline. Understanding basal sex differences and their  
63 regulation in the hippocampus can help gain insight into the etiology of sex differences in  
64 hippocampal dysfunction in common neurological diseases. The focus of this study is to  
65 understand the regulation of hippocampal transcriptomic and epigenomic sex differences as they  
66 are affected by gonadal sex and/or sex chromosomal content.

67 At the most basic level, sex determination in mammals occurs as a result of sex chromosome  
68 complement. The presence or absence of the sex-determining region of Y (*Sry*) gene, encoded  
69 on the Y chromosome, is necessary and sufficient for development of testis. In the absence of  
70 *Sry*, mammals develop ovaries. As such, development into a gonadal female generally occurs  
71 when the embryo has two X and no Y chromosomes, whereas a gonadal male develops when  
72 the embryo has one copy of X and one copy of Y chromosome.

73 After gonad differentiation into testis or ovaries, hormonal secretions influence the organism's  
74 sexual phenotype. There are organizational effects of hormonal secretions that cause irreversible  
75 sex differentiation and activational effects may be temporary and reversible and can occur at any  
76 stage of life<sup>2</sup>. In a seminal paper, Phoenix et al (1959)<sup>3</sup> described the organizational-activational  
77 theory of sexual differentiation in which during early development, hormones have an  
78 organizational effect on neural tissue development and circuitry that mediates mating (and likely  
79 other behaviors). During adulthood, once the organizational framework is established, activational  
80 effects are mediated in the presence of gonads and related sex hormones. Gonadectomies with  
81 and without hormone replacement can be used in animal models to study the activational effects  
82 of gonadal hormones. For example, gonadectomized rats showed a memory deficit in Morris  
83 water maze testing, along with a decrease in androgen receptor-immunoreactive neurons.  
84 Treatment with testosterone in the gonadectomized rats attenuated the cognitive deficits and  
85 increased the number of androgen receptor-immunoreactive neurons<sup>4</sup>. Postnatal gonadectomies  
86 and/or hormone therapies have been used to separate activational and organizational  
87 contributions of sex hormones on phenotypic sex differences in the hippocampus in both rats<sup>5-7</sup>

88 and mice<sup>8-10</sup> with mixed results regarding phenotypic effects. As such, both gonadal hormones  
89 and sex chromosome complement likely contribute to sex effects in the hippocampus.

90 In summary, the direct contributors to phenotypic sex effects are: (1) activational effects of sex  
91 hormones, (2) organizational effects of sex hormones, and (3) sex chromosome effects<sup>11</sup>. There  
92 is an inherent difficulty in studying relative contributions of the three causes of sex effects, since  
93 the gonadal/hormonal sex and chromosomal sex are naturally coupled.

94 However, understanding these relative contributions of hormones and chromosomal content to  
95 health and disease is a public health imperative. For example, activational effects of hormones  
96 are an attractive target for therapeutic interventions (i.e., hormone replacement therapy (HRT)) in  
97 neurological conditions with sex differences. Nevertheless, this approach has been met with  
98 variable success. Observational studies of HRT effects on cognitive function in AD and Mild  
99 Cognitive Impairment (MCI) have had mixed results. A randomized, double-blind, placebo-  
100 controlled clinical trial was conducted to determine if administration of estrogen replacement  
101 therapy had an effect on cognition in women with AD that had received a hysterectomy showed  
102 no effect on the progression of cognitive decline after one year<sup>12</sup>.

103 Despite being the biggest genomic difference between humans, the role of sex chromosomes in  
104 sex effects is complex and still mostly unclear. The Y chromosome only contains around 70  
105 protein-coding genes, it also encodes more than 100 noncoding RNAs of unknown function.  
106 Moreover, the mosaic loss of Y chromosome with age has been linked to several cancers as well  
107 as Alzheimer's disease. The X chromosome is relatively gene dense with between 900 and 1500  
108 genes, but its expression profile is complicated by the random inactivation of one X-chromosome  
109 on a cell-by-cell basis due to dosage compensation<sup>13</sup>. Sex chromosome aneuploidies seen in  
110 humans include Turner syndrome (XO), Triple X Syndrome (XXX), and Klinefelter syndrome  
111 (XXY). Females with Turner syndrome, or X monosomy, are generally shorter in stature, have  
112 gonadal dysfunction, and are at a greater risk for autoimmune diseases and learning disabilities,  
113 such as autism, ADHD, and other neurodevelopment disorders<sup>14</sup>. Females with Triple X  
114 syndrome, or Trisomy X, have widely variable symptoms that can include delayed speech and  
115 language skills, learning disabilities, increased prevalence of ADHD/autism, and increased  
116 anxiety and depression. Males with Klinefelter syndrome have more anxiety/depression, ADHD,  
117 and autism, as well as developing autoimmune diseases at higher rates more similar to XX  
118 females<sup>15</sup>. From these naturally occurring chromosome anomalies in humans, it appears that sex  
119 chromosome complement, especially the number of X chromosomes, could also play a role in  
120 sex differences seen in common neurological conditions.

121 Sex chromosome complement (XX vs. XY) can affect brain development through a variety of  
122 mechanisms: 1) The presence or absence of *Sry* (and other Y encoded genes), 2) X chromosome  
123 inactivation through *Xist*, 3) Dosage of X chromosome genes (1X vs 2X) and X chromosome  
124 imprinting, 4) Epigenetics (DNA modifications, chromatin accessibility, histone modifications, etc)  
125 of the sex chromosomes (X and Y), and 5) autosomal epigenetics due to a sex chromosome  
126 encoded factor<sup>16</sup>. In addition, with aging epigenetic changes such as loss of silencing,  
127 progressively increasing bias in paternal vs maternal X-inactivation, and even mosaic loss of the  
128 Y-chromosome all may contribute to sex differences in neurodegenerative processes and other  
129 aspects of health.

130 Of particular interest in epigenetic factors is methylation - the fifth carbon of cytosine, resulting in  
131 DNA modification 5-methyl-cytosine (mC). This modification is generally studied in the context of  
132 CpG dinucleotides due to their palindromic representation across DNA strands allowing for fidelity  
133 in maintaining modification patterns in mitotic cells. Neurons and other post-mitotic cells in the  
134 brain show higher levels of non-CpG (CH) methylation than other non-CNS tissue.

135 X-chromosome inactivation (XCI) is a mechanism that causes silencing of a random X-  
136 chromosome during female embryogenesis and XCI is an important mechanism in X-  
137 chromosome gene dosage compensation between males and females<sup>17</sup>. Maintenance of XCI in  
138 somatic cells occurs via a combination of epigenomic mechanisms, including DNA methylation.  
139 LncRNA *Xist* coats the inactive X-chromosome (Xi) and recruits chromatin modifiers to stably  
140 repress transcription from Xi. Hallmarks of XCI include changes to histone modifications and  
141 hypermethylation of cytosine residues in CG contexts<sup>18</sup>. However, Xi is not fully repressed and a  
142 subset of X-chromosome genes are consistently expressed from the Xi, leading to higher overall  
143 gene expression in females<sup>19,20</sup>. Further, escape from X-inactivation in females has been  
144 implicated in the female bias in autoimmune diseases<sup>21,22</sup> and Alzheimer's disease<sup>23</sup>.

145 Previous reports have established sex differences in the hippocampal epigenome and  
146 transcriptome with brain aging<sup>24,25</sup> and disease<sup>26-28</sup>. To disentangle the effects of sex (testes v.  
147 ovaries; M v. F) and sex chromosome complement (XX v. XY) on the steady state gene  
148 expression and DNA modification patterning of the hippocampus, we use the Four Core Genotype  
149 (FCG) mouse model<sup>29</sup>. The FCG model involves a translocation of the *Sry* from the Y  
150 chromosome to an autosome on a C57BL/6 background, resulting in the FCG XY male (XYM).  
151 Crossing the XYM with a wildtype XX female (XXF), results in the FCG: XX and XY mice with  
152 testes (XXM/XYM) and XX and XY mice with ovaries (XXF/XYF) (**Figure 1A**). This allows for 2-

153 way statistical comparisons to assess the hormonal, chromosomal, and interactive effects on  
154 molecular and phenotypic outcomes.

155 Early FCG mouse studies were aimed at determining if sex chromosome complement (XX v. XY)  
156 played an important role in development of well-established sexually dimorphic phenotypes. Male  
157 copulatory behavior, social exploration behavior, and anatomical organization of the central  
158 nervous system were found to be regulated primarily by gonadal hormones regardless of sex  
159 chromosome complement<sup>30-33</sup>. In addition to sex hormone effects on brain development, FCG  
160 studies have shown sex chromosome complement influences neuronal phenotype<sup>34</sup>,  
161 nociception<sup>35</sup>, and neural tube closure<sup>36</sup>. Using FCG model in combination with Experimental  
162 Autoimmune Encephalomyelitis (EAE) and pristane-induced Systemic Lupus Erythematosus  
163 (SLE) models shows a sex chromosome effect (XX v. XY) on disease severity with worse disease  
164 scores in XX genotypes as compared to XY phenotypes, regardless of gonadal sex (M v. F)<sup>37</sup>.  
165 Additionally, the XX mice have longer lifespans, regardless of gonadal sex<sup>38</sup>, and XX mice have  
166 resiliency to death in an AD mouse model<sup>39</sup>.

167 Although hippocampal sex differences in the transcriptome and epigenome are well-established  
168 across development, aging, and disease in mice and humans, the relative contributions of sex  
169 chromosome complement (XX v. XY) and gonadal sex (M v. F) to the steady state and stimulus  
170 responsive transcriptome and epigenome are not fully defined.

171 In this study, we use transcriptomic and epigenetic approaches to examine the hippocampal  
172 transcriptome and methylome in adult FCG mice. We then compare our findings to previously  
173 identified hippocampal sex differences (both in normal conditions and in disease) to begin to  
174 disentangle contributions of sex chromosome complement (XX v. XY) and gonadal sex (testes v.  
175 ovaries; M v. F) to sex differences in transcriptional programming.

## 176 **Results**

### 177 ***Sry* copy number and localization in adult FCG hippocampi.**

178 The testis-determining *Sry* gene is considered the “master switch” in mammalian sex  
179 determination. During mammalian embryogenesis, bipotential gonads form from the genital ridge  
180 with a default to become ovaries. Expression of *Sry* upregulates SRY box containing gene 9  
181 (*Sox9*) which leads to the differentiation of Sertoli cells, the formation of testis, and the  
182 suppression of the female sex-determining pathway<sup>40</sup>. In the FCG model, *Sry* is deleted from the  
183 Y chromosome and *Sry* is translocated onto an autosome, uncoupling gonadal sex from genetic

184 sex. The localization of *Sry* however has not been fully determined. Previous initial reports<sup>41</sup> used  
185 fluorescence *in situ* hybridization (FISH) to localize a concatemer of *Sry* on chromosome 3 in FCG  
186 males. We sought to determine the number of copies of the *Sry* gene and to precisely mark the  
187 location of the translocated *Sry* as well as if there was more than one site of translocation. A novel  
188 digital PCR *Sry* copy number assay performed on FCG hippocampal DNA confirmed 12-14 copies  
189 of *Sry* in FCG males (XXM/XYM), as compared to one copy in WT males (**Figure 1B**). Linked  
190 read sequencing of high molecular weight DNA from FCG XYM shows no linkage between *Sry*  
191 gene and the adjacent region of the Y chromosome (**Figure 1C**) and strong linkage of *Sry* with a  
192 region on chromosome 3 (**Figure 1D**) within a region with no known gene annotation.

### 193 **Transcriptomic analysis of sex chromosomal (X/Y) differential expression from adult FCG** 194 **hippocampi.**

195 After quantifying and localizing *Sry* we sought to determine the relative contributions of gonadal  
196 and sex chromosomal content to transcriptomic regulation of the sex chromosomes (X/Y) through  
197 RT-qPCR and RNA-Seq analyses.

198 In mammals, females have two X chromosomes and males only have one X chromosome. This  
199 results in a difference in X chromosome gene dosage requiring compensatory mechanisms to  
200 balance X chromosome gene expression in both sexes. Compensation for double dosage of X  
201 chromosomes in females can occur by: decreasing (halving) female X chromosome gene  
202 expression through inactivation of one X chromosome copy, or increasing (doubling) male X  
203 chromosome gene expression, or a combination of these two mechanisms.

204 Despite compensatory mechanisms, there are a number of X chromosome genes whose  
205 expression is imbalanced between males and females in the mouse hippocampus. Previous  
206 reports have established differentially expressed sex chromosomally-encoded genes in the  
207 mouse hippocampus throughout development and aging<sup>26,42-44</sup> (**Supplemental Table 1; GEO**  
208 **Accession:** GSE83931, GSE135752, GSE76567; **SRA bioProject:** PRJNA523985).  
209 Intersection of sex chromosomally-encoded (X/Y) differentially expressed genes by sex, identified  
210 eight common genes across all studies (**Figure 2A, Supplemental Table 1**), including X  
211 chromosome genes (*Xist*, *Ddx3x*, *Kdm6a*, and *Eif2s3x*) and Y chromosome genes (*Kdm5d*,  
212 *Eif2s3y*, *Uty*, *Ddx3y*). The four common ChrX genes (*Xist*, *Ddx3x*, *Kdm6a*, and *Eif2s3x*) have all  
213 been identified as genes likely to escape X-inactivation<sup>45</sup>. The Xi escape of *Ddx3x*, *Kdm6a*, and  
214 *Eif2s3x* are likely due to intolerance of haploinsufficiency, as each of these genes have Y-encoded  
215 paralogs *Ddx3y*, *Uty*, and *Eif2s3y*, respectively. Mutations in *Ddx3x*, *Kdm6a*, and *Eif2s3x* have

216 all been associated with X-linked intellectual disability<sup>46,47</sup>. Differences in the functionality of the  
217 X- and Y-encoded paralogues may contribute to sex-biases observed in brain disease. For  
218 example, although X-encoded *Kdm6a* has histone demethylase activity, the Y-encoded paralog  
219 *Uty* is catalytically inactive<sup>48</sup>. A recent study showed that a second X chromosome conferred  
220 resilience in a mouse model of AD, independent of gonadal sex, in part due to the ‘double-dose’  
221 of *Kdm6a*<sup>48</sup>.

222 We first wanted to establish that dosage compensatory gene *Xist* was induced by sex  
223 chromosome complement (XX v. XY) in FCG hippocampi, regardless of gonadal sex (M v. F).

224 X-inactive specific transcript (*Xist*) is a non-coding RNA that stabilizes the inactive X chromosome  
225 (Xi) and interacts with various silencing factors to alter chromatin accessibility through a variety  
226 of epigenetic mechanisms<sup>49</sup>. RNA isolated from FCG (XXF, XYF, XXM, XYM) hippocampi (n=10-  
227 16/group) was assessed for *Xist* expression by RT-qPCR. In the FCG hippocampus, *Xist* was  
228 differentially expressed by sex chromosome complement (XX v. XY) regardless of gonadal sex,  
229 with no detected expression in XY genotypes (**Figure 2B**; Two-way ANOVA, Main effect of sex-  
230 chromosome complement (XX v. XY), \*\*\*p<0.001) and no effect of gonadal sex. Sex differences  
231 in *Xist* expression in the FCG hippocampus parallels that of wild type animals and shows a clear  
232 influence of sex chromosome complement in the modulation of X-chromosome dosage  
233 compensation.

234 Lysine demethylase 5D (*Kdm5d*) is a Y-chromosome encoded gene that mediates H3K4  
235 demethylation and has been shown to be important in modulating sexually dimorphic gene  
236 expression<sup>50</sup>. DEAD-Box Helicase 3 Y-Linked (*Ddx3y*) is part of the male-specific region of the Y  
237 chromosome and contains a conserved Asp-Glu-Ala-Asp (DEAD) motif that are used by ATP-  
238 dependent RNA helicases<sup>51</sup>. Expression of Y-chromosome genes *Kdm5d* and *Ddx3y* were  
239 assessed by RT-qPCR. In the FCG hippocampus, there was a main effect of chromosome (XX v.  
240 XY) on *Kdm5d* and *Ddx3y* expression, with higher expression in XY and no detected expression  
241 in XX genotypes (**Figure 2C-D**; Two-way ANOVA, main effect of sex-chromosome complement  
242 (XX v. XY), \*\*\*p<0.001). There was no main effect of gonadal sex (M v. F) on the expression of  
243 *Kdm5d* or *Ddx3y* in the FCG hippocampus.

244 To assess the transcriptome in an unbiased manner, Directional RNA Sequencing (RNA-Seq)  
245 libraries were prepared from FCG hippocampal RNA (n=5-6/group) and sequenced on Illumina’s  
246 NextSeq500 platform. After aligning, quantifying, and calling differentially expressed genes in  
247 StrandNGS software, twenty differentially expressed X-chromosome genes were identified with a



248 main effect of chromosome (XX v. XY) regardless of sex (M v. F) with nine genes higher and 11  
249 genes lower in XX vs. XY (**Figure 2E**; Two-Way ANOVA, BHMTTC,  $FC \geq 1.25$ ,  $FDR < 0.1$ ). Among  
250 these genes were the eight previously identified genes from **Figure 2A**. Only two X chromosome  
251 genes (*Ace2*, *Aff2*) were differentially expressed by sex (M v. F) (**Figure 2F-G**; Two-Way ANOVA,  
252 BHMTTC,  $FC \geq 1.25$ ,  $FDR < 0.1$ ).

253 Four Y-encoded genes were found to be expressed and each of the four Y chromosome genes  
254 were differentially expressed by chromosome (XX v. XY) (**Figure 2H**; Two-Way ANOVA, BHMTTC,  
255  $FC \geq 1.25$ ,  $FDR < 0.1$ ). There were no Y chromosome genes differentially expressed by sex (M v.  
256 F).

257 Erythroid differentiation regulator 1 (*Erd1*) is part of X and Y chromosome pseudoautosomal  
258 region (PAR) that is able to crossover and recombine during meiosis. As such, genes within the  
259 PAR have the same sequence on the X and Y chromosome and the chromosomal origin (X or Y)  
260 of these transcripts cannot be determined with traditional RNA-Seq. In FCG hippocampi, *Erd1* is  
261 differentially expressed by sex chromosome complement (XX v. XY), with higher levels in XX  
262 animals (**Figure 2I**).

263 The eight common previously identified X/Y-chromosome sex differences (**Figure 2A**,  
264 **Supplemental Table 1 (Intersection)**) were all differentially expressed by sex chromosome  
265 complement (XX v. XY) but not gonadal sex in the adult FCG hippocampus. When comparing the  
266 union of all sex differentially expressed genes from previous hippocampal studies (**Figure 2A**,  
267 **Supplemental Table 1 (Union)**) to the differentially expressed genes by sex chromosome  
268 complement (XX vs. XY) in the FCG hippocampus (**Figure 2B-I**) there are 18 genes in common  
269 (**Figure 2J**). After running these 18 genes through the Gene Ontology (GO), four biological  
270 processes were overrepresented (Fisher's Exact,  $FDR < 0.05$ ), including: 1) positive regulation of  
271 translational fidelity, 2) histone H3-K27 demethylation, 3) histone H3-K4 demethylation, and 4)  
272 formation of translation preinitiation complex (**Figure 2K**). Regulation of histone H3-K27 and H3-  
273 K4 methylation have both been implicated in the initiation and maintenance of X-chromosome  
274 inactivation<sup>52</sup>.

## 275 **Sex chromosome (X/Y) methylation patterns by Whole Genome Oxidative Bisulfite** 276 **Sequencing (WGoBS) in FCG hippocampi.**

277 DNA methylation can regulate gene expression by a variety of mechanisms, including (but not  
278 limited to): 1) direct transcription inhibition by blocking transcription factor binding<sup>53</sup>, 2) indirect  
279 transcription regulation by recruitment of chromatin modifiers and methyl binding proteins<sup>54-57</sup>, 3)

280 genomic imprinting<sup>58</sup>, and 4) X-chromosome inactivation<sup>59-61</sup>. Although methylated DNA is  
281 generally associated with transcriptional silencing, there are reported cases where DNA  
282 methylation may also serve an activational role<sup>62</sup>.

283 In females, X-chromosome inactivation (XCI) occurs through multi-layer epigenetic mechanisms  
284 that ultimately compact the inactive X-chromosome (Xi) into a heterochromatic Barr Body. Early  
285 in development, the long-noncoding RNA (lncRNA) *Xist* is expressed from Xi and provides a *cis*-  
286 coating that recruits protein complexes, leading to changes in chromatin accessibility and DNA  
287 modifications<sup>13</sup>. Changes in histone modifications<sup>52</sup> and DNA methylation stabilizes Xi in the  
288 inactive state<sup>63</sup>. In this study, we assess the efficacy of Xi epigenetic silencing in the FCG mouse  
289 model by analyzing the X chromosome DNA methylation patterning in FCG hippocampal DNA.

290 To assay DNA methylation, DNA isolated from FCG hippocampi (n=3/group) was oxidized and  
291 bisulfite-converted prior to constructing whole genome libraries for sequencing on Illumina's  
292 NovaSeq6000 platform. After aligning and calling methylation values, the whole genome  
293 methylation levels in both CG and non-CG (CH) contexts were calculated. There were no  
294 observed differences in overall whole genome methylation in CG context (mCG) (**Figure 3A**) by  
295 sex (M v. F) or sex chromosome complement (XX v. XY).

296 When focused on the X chromosome, XX genotypes have higher mCG levels than XY genotypes,  
297 regardless of sex (M v. F) (**Figure 3B**; Two-way ANOVA, main effect sex chromosome  
298 complement (XX v. XY), \*\*\*p<0.001). There was no difference in mCG percentages in repetitive  
299 elements on the X-chromosome (**Figure 3C**; Two-way ANOVA) but in non-repetitive elements,  
300 higher methylation in XX genotypes than XY genotypes regardless of their gonadal sex was  
301 observed (**Figure 3D**; Two-way ANOVA, main effect sex chromosome complement (XX v. XY),  
302 \*\*\*p<0.001). In non-CpG (CH) context, there was no overall difference in methylation (**Figure 3E**).  
303 However, there was higher X-chromosome mCH in XY than XX, regardless of gonadal sex  
304 (**Figure 3F**; Two-way ANOVA, main effect sex chromosome complement (XX v. XY), \*\*\*p<0.001).  
305 Higher XY mCH was seen in both repetitive (**Figure 2G**) and non-repetitive (**Figure 3H**) elements  
306 of the X-chromosome, as compared to XX (Two-way ANOVA, main effect sex chromosome  
307 complement (XX v. XY), \*\*\*p<0.001). These X-chromosomal methylation trends are consistent  
308 with previous reports<sup>64</sup>.

309 Since the sex chromosome complement (XX v. XY) difference in mCG appears to be  
310 concentrated in non-repetitive elements of the X chromosome, we assessed the mCG patterning  
311 in and around CpG islands, gene bodies, and CTCF binding sites. CpG islands (CGIs) are

312 relatively long stretches (500-2000nt) of GC-rich DNA that are predominantly unmethylated<sup>65</sup>.  
313 CGIs have higher methylation on the Xi<sup>66</sup>. In the FCG hippocampi, XX genotypes have higher  
314 mCG within CGIs, shores, and shelves than XY genotypes, regardless of gonadal sex. The largest  
315 average mCG difference occurs in the CGI followed by the shores and then shelves (**Figure 3I**;  
316 Two-way ANOVA, main effect chromosome (XX v. XY)). While on average most CGIs are  
317 hypermethylated in XX (over XY) genotypes, there is a small subset of genes which show  
318 hypomethylation of CGIs in XX (vs. XY).

319 Similarly, gene bodies and the regions 4 kilobases upstream from the transcription start site (TSS)  
320 and 4 kb downstream of the transcription end site (TES) had higher mCG in XX than in XY  
321 genotypes (**Figure 3J**; Two-way ANOVA, main effect chromosome (XX v. XY)). The largest  
322 difference in mCG was in the regions 4 kilobases upstream from the transcription start site (TSS),  
323 inclusive of the gene promoter.

324 CCCTC-binding factor (*CTCF*) is a zinc-finger protein that mediates chromatin insulation and  
325 gene expression by binding 12- to 20-bp DNA motifs (CTCF binding sites) and altering the 3-  
326 dimensional chromatin structure. CTCF has high affinity for certain RNA transcripts, including *Xist*  
327 and anti-sense transcript *Tsix*,<sup>67</sup> which may help to differentially package the inactive and active  
328 X chromatin. In the FCG hippocampus, there is lower mCG in X Chromosome CTCF binding sites  
329 as compared to mCG on the whole X chromosome in all genotypes (XXF, XXM, XYF, XYM).  
330 There is higher mCG in XX hippocampi than XY, regardless of gonadal sex (**Figure 3K**). The  
331 magnitude of difference between XX and XY mCG in CTCF binding sites (~10%) is much greater  
332 than the average difference seen across the X chromosome (~3%).

333 Together, the methylation analysis of the X chromosome in FCG hippocampi suggests that X  
334 chromosome methylation is regulated by sex chromosome complement (XX v. XY) and likely not  
335 influenced by gonadal status.

### 336 **X-chromosome differentially methylated regions (DMRs) by Whole Genome Oxidative** 337 **Bisulfite Sequencing (WGoBS) in FCG hippocampi.**

338 After exploring the overall levels and patterning of DNA methylation on the X chromosome, mCG  
339 DMRs were called using 1 kb non-overlapping windows with minimum average difference of 10%  
340 between at least two groups (Chisq-test, sliding linear model (SLIM)  $q < 0.05$ ) and post-hoc  
341 Bonferroni corrected t-tests (XXF v. XYF, XXM v. XYM, XXF v. XXM, XYF v. XYM) were used to  
342 assess pairwise differences. Using these criteria, we identified 1011 DMRs between XXF and  
343 XYF and 1367 DMRs between XXM and XYM, with 369 common DMRs (**Figure 4A**) on the X

344 chromosome. The 369 common DMRs appear to be evenly distributed across the X chromosome  
345 with some gaps containing no DMRs (**Figure 4B**). In agreement with the average difference in  
346 mCG (XX-XY) across the X chromosome, there are more hypermethylated DMRs in the XX  
347 genotypes as compared to the XY genotypes (**Figure 4C**). When the DMR methylation was higher  
348 in the XX genotypes, the XY genotypes had methylation values close to zero (**Figure 4D**). In  
349 cases where the XX genotypes had lower DMR methylation than the XY genotypes, the XY  
350 genotypes had methylation values close to 100% (**Figure 4D**). Sex-chromosomally driven DMRs  
351 were enriched in CGI, CGI shores, gene bodies, promoters, promoter flanking regions, CTCF  
352 binding sites, and simple repeats; DMRs were depleted in most repetitive elements (LINEs,  
353 SINES, LTRs) and open chromatin (**Figure 4E**).

### 354 **Comparison of X chromosome gene expression and DNA methylation in FCG** 355 **hippocampi.**

356 DNA methylation regulates gene expression and genomic accessibility. The predominant theory  
357 in the field has been that methylation in gene promoters blocks the binding of transcription factors  
358 leading to repressed gene expression. In recent years, multiple additional theories of DNA  
359 modifications control of gene expression have been posited that include varied genomic regions  
360 (ie. distal regulatory elements, gene bodies) and cytosine context (mCG vs. mCH). Here we  
361 correlate DEG expression with gene body mCG and find significant negative associations with  
362 *Xist* (**Figure 4F**), *Flna* (**Figure 4G**), *Arhgap6* (**Figure 4H**), *Hccs* (**Figure 4I**).

### 363 **Targeted bisulfite amplicon sequencing (BSAS) of X-chromosome gene promoters in FCG** 364 **hippocampal DNA**

365 Our WGoBS data had 2-6X genome-wide coverage, which is sufficient to analyze methylation  
366 values in windows and collapse certain genomic regions. In order to assess base-specific  
367 methylation patterning, we performed targeted bisulfite amplicon sequencing (BSAS) within the  
368 promoter region of X-chromosome genes.

369 X-linked DEAD-box RNA helicase DDX3 (*Ddx3x*) plays an integral role in transcription and  
370 translation, as well as splicing and RNA transport. Mutations in *Ddx3x* have been associated with  
371 intellectual disability and developmental delays<sup>46</sup>. In our study, *Ddx3x* is more highly expressed  
372 in XX genotypes (XXF/XXM) as compared to XY genotypes (XYF/XYM). We amplified a region  
373 of the *Ddx3x* promoter, containing 4 CpG sites. The average mCG across that region was higher  
374 in XX genotypes as compared to XY genotypes, regardless of gonadal sex (**Figure 5A**). When  
375 examining the site-specific mCG across the amplified region of the *Ddx3x* promoter, all 4 mCG

376 sites have higher mCG in XX genotypes than XY genotypes (**Figure 5B**). The site-specific  
377 methylation appears to be strongly regulated by sex chromosome complement, as evidenced by  
378 the consistent topography of mCG.

379 Many of the consistently detected sexual dimorphisms on the X-chromosome are involved in  
380 maintenance of X-chromosome inactivation through cis-coating of the *Xist* transcript and the  
381 histone demethylase activities of *Kdm6a*, *Kdm5d*, and *Uty*. As such, both the X-chromosome gene  
382 expression and DNA methylation appear to be strongly regulated by sex chromosome  
383 complement. Although there were 2 genes (*Ace2*, *Aff1*) differentially expressed by sex, we did  
384 not find any examples of X-chromosome genomic features differentially methylated by gonadal  
385 sex (M v. F).

386 Following sex-chromosomally driven sex determination, development of the gonads and  
387 production of sex hormones further drives dichotomization of sexual phenotypes. In gonadal  
388 males, testes produce testosterone, an androgenic hormone<sup>68</sup>. Androgen receptor (*Ar*) is a  
389 hormone nuclear receptor and transcription factor that has many biological functions, including  
390 proper development of male reproductive organs and secondary sex characteristics<sup>69</sup>. Androgens  
391 have been found to effect hippocampal structure and function, as well as playing a role in  
392 hippocampal-dependent behavior, long-term potentiation, and dendritic arborization<sup>70</sup>.

393 *Ar* is an X-chromosomally encoded gene and subject to X-chromosome inactivation. Although *Ar*  
394 was not differentially expressed by sex in outside studies (**Supplemental table 1 (Union)**) or in  
395 the present study (neither by sex (M v. F) or sex-chromosome complement (XX v. XY)), we  
396 wanted to determine if gonadal sex had any effect on *Ar* promoter methylation. BSAS analysis of  
397 22 CpGs in the *Ar* promoter region, showed very low (~0%) mCG in XY genotypes with close to  
398 40% average methylation in XX genotypes, regardless of gonadal sex (**Figure 5C**). Each CG-site  
399 within the amplified region of the *Ar* promoter has lower mCG (~0%) in XY genotypes compared  
400 to XX genotypes (~10-60%), regardless of gonadal sex. The patterning of *Ar* promoter mCG is  
401 well-conserved between XXF and XXM, suggesting tight regulation of *Ar* promoter methylation by  
402 sex chromosome complement, with no effect of gonadal sex (**Figure 5D**).

403 Toll-like receptor (*Tlr7*) is an X-encoded pattern recognition receptor (PRR), critical in innate  
404 immunity. *Tlr7* recognizes single-stranded viral RNA (ssRNA)<sup>71</sup> and is primarily expressed on  
405 microglia in the brain<sup>72</sup>. In response to ssRNA, *Tlr7* initiates a Type I interferon (IFN) response.  
406 *Tlr7* was differentially expressed in outside studies (**Supplemental table 1 (Union)**) and by sex-  
407 chromosome complement in the present study (**Figure 2E**) with higher expression in XY (v. XX)

408 genotypes. The average mCG in an amplified region of the *Tlr7* promoter containing 4 CG sites  
409 is higher in XX genotypes over XY genotypes (**Figure 5E**). Three of the four CG sites within the  
410 amplified region were higher in XX genotypes as compared to the XY genotypes, with no  
411 differences by gonadal sex (**Figure 5F**).

412 *Xist* was one X-encoded gene that was differentially expressed by sex in all outside studies  
413 examined (**Supplemental table 1 (Intersect)**) and by sex chromosome complement in the  
414 present study (**Figure 1B,1E**). As a critical regulator of X-inactivation and X-chromosome dosage  
415 compensation, we analyzed mCG in an amplified region of the *Xist* promoter in FCG hippocampi.  
416 The average mCG within the amplified region of the *Xist* promoter was higher in XY genotypes  
417 than XX genotypes, regardless of their gonadal sex (**Figure 5G**). The base-specific topography  
418 of CG methylation is well conserved by sex chromosome complement (XX/XY), with no effect of  
419 gonadal sex (**Figure 5H**).

420 Angiotensin-converting enzyme 2 (*Ace2*) is surface receptor responsible for negative regulation  
421 of the renin-angiotensin system to modulate blood pressure and fluid/electrolyte balance. *Ace2*  
422 recently gained attention as the entry receptor for the novel SARS-coronavirus 2 (SARS-CoV-  
423 2)<sup>73</sup>. *Ace2* was differentially expressed by sex in the outside studies we examined (**Supplemental**  
424 **table 1 (Union)**) and by gonadal sex (M v. F) in the present study (**Figure 2G**). We assessed the  
425 mCG at a single CpG site within the *Ace2* promoter and found higher mCG in XY genotypes as  
426 compared to XX genotypes, irrespective of their gonadal sex (**Figure 5I**).

427 In summary, targeted methylation analysis confirmed that X-chromosome methylation is tightly  
428 regulated, in a base-specific fashion, by sex chromosome complement, and not gonadal sex.

#### 429 **Transcriptomic analysis of autosomal differential expression from adult FCG hippocampi.**

430 After establishing that the sex chromosome transcriptome and methylome of FCG hippocampi  
431 are primarily controlled by sex chromosome complement (XX v. XY), we examined autosomal  
432 regulation of sex differences. We first intersected the previous hippocampal transcriptomic studies  
433 to determine steady-state sex differences in the mouse hippocampus (**Figure 6A**). Although there  
434 were no sex differences in common between all studies (**Supplemental Table 2 (Intersection)**),  
435 there were 2896 sex differences identified in at least one study (**Supplemental Table 2 (Union)**).  
436 We next ran GO Biological Process Over-Representation Analysis (ORA) using WEB-based  
437 GENE SeT AnaLYsis Toolkit (WebGestalt, [www.webgestalt.org](http://www.webgestalt.org)) on autosomal genes that were  
438 differentially expressed by sex in at least one outside study (**Supplemental Table 2 (Union)**).  
439 Enriched GO pathways were visualized on a reduced directed acyclic graph (DAG) (**Figure 6B**).

440 We identified 10 major GO terms, including cell-cell adhesion via plasma-membrane adhesion  
441 molecules, connective tissue development, epithelial cell proliferation, reproductive system  
442 development, urogenital system development, muscle system process, embryonic organ  
443 development, gliogenesis, multicellular organismal homeostasis, and pattern specification  
444 process (**Supplemental Table 3**).

445 We assessed autosomal sex differences in FCG hippocampus by sex chromosome complement  
446 (XX v. XY) and gonadal sex (M v. F) using directional RNA-Seq. After aligning, quantifying, and  
447 calling differentially expressed genes in StrandNGS software, 186 differentially expressed genes  
448 were identified: 62 genes differentially expressed by sex chromosome complement alone (XX v.  
449 XY), 123 genes differentially expressed by sex (M v. F), and 26 genes differentially expressed by  
450 both sex chromosome complement and gonadal sex (**Figure 6C**). Principal component analysis  
451 of differentially expressed autosomal genes shows separation by gonadal sex in component 1  
452 and separation by sex chromosome complement in component 2 (**Figure 6D**). Hierarchical  
453 clustering of autosomal-encoded DEG shows proper clustering of samples by genotype (**Figure**  
454 **6E**). ORA of the 37 chromosomally-driven (XX v. XY) sex differences in the FCG hippocampus  
455 revealed three pathways (synaptic vesicle cycle, nucleoside bisphosphate metabolic process,  
456 monoamine transport) enriched (FDR<0.05). Pathway analysis identified three pathways  
457 (response to protozoan, response to virus, antigen processing and presentation) differentially  
458 regulated by gonadal sex in the FCG hippocampus (FDR<0.05). Similar analysis of the 17 genes  
459 that were differentially expressed by sex chromosome complement and gonadal sex uncovered  
460 three pathways (response to protozoan, response to interferon beta, and response to virus)  
461 (**Figure 6F**).

462 Since we identified response to viruses and interferon-beta as pathways enriched in sex  
463 differences in the FCG hippocampus, we next further examined interferon-associated genes IRF-  
464 7 and IFIT-3. Interferon (IFN) is part of the innate immune system important in antiviral immunity.  
465 Upon viral recognition, production of IFN triggers the expression of IFN-stimulated genes (ISGs).  
466 IFN-beta is a type I IFN that is activated through PRRs<sup>74</sup>, like Tlr7. In the brain, IFN-beta is  
467 primarily expressed by microglia<sup>72</sup>. In mouse models of AD, IFN was found to activate microglia  
468 leading to neuroinflammation and synaptic degradation. Blocking IFN signaling decreased  
469 microglia activation and concomitant synapse loss. Activation of IFN pathway was also observed  
470 in human AD<sup>75</sup>.

471 Transcription factor IRF-7 is considered a “master regulator” in type-I IFN responses<sup>76</sup>. *Irf7* was  
472 differentially expressed by sex in one of the previously examined studies (**Supplemental Table**

473 **2 (Union)**). *Irf7* was also differentially expressed in our study by sex chromosome complement  
474 (XX v. XY) and gonadal sex (M v. F) in FCG hippocampus as evidenced by RNA-Seq  
475 (**Supplemental Table 3**) and RT-qPCR confirmation (**Figure 6G**). Interferon-induced protein with  
476 tetratricopeptide repeats 3 (IFIT3) is an antiviral RNA-binding protein which acts an intermediary  
477 in the activation of IRF-3 and upregulation of IFN-beta<sup>77</sup>. *Ifit3* was differentially expressed in one  
478 of the examined outside studies (**Supplemental Table 2 (Union)**). *Ifit3* was also differentially  
479 expressed by sex chromosome complement (XX v. XY) and gonadal sex (M v. F) in FCG  
480 hippocampus as evidenced by RNA-Seq (**Supplemental Table 3**) and RT-qPCR confirmation  
481 (**Figure 6H**).

482 Antigen processing and presentation was another pathway that was over-represented in our  
483 analysis of genes differentially expressed by gonadal sex in the FCG hippocampus. Microglia are  
484 the primary antigen presentation cells in the brain<sup>78</sup>. Class I major histocompatibility (MHC-I)  
485 complexes function in innate immune viral antigen presentation and detection. MHC-I  
486 components include B2m, H2-D1, and H2-K1. Previous studies from our lab identified sexually  
487 dimorphic induction of MHC-I with aging in the mouse and rat hippocampus<sup>79,80</sup>. Here we show  
488 differential expression of B2m by gonadal sex (**Figure 6J**) and H2-D1/H2-K1 by sex chromosome  
489 complement and gonadal sex (**Figure 6K-L**) in the FCG hippocampus (n=10-16/group, Two-Way  
490 ANOVA, main effect of sex chromosome complement (XX v. XY) or gonadal sex (M v. F)).

#### 491 **Autosomal chromosome levels of methylation in FCG hippocampus by WGoBS**

492 After analyzing autosomal sex differences in the FCG hippocampus, we assessed autosomal  
493 methylation in CG and CH context by WGoBS. Overall, there were no differences in autosomal  
494 mCG (**Figure 7A**), with no difference in autosomal mCG in repetitive (**Figure 7B**) or non-repetitive  
495 (**Figure 7C**) elements. There also was no difference in average autosomal mCH (**Figure 7D**),  
496 with no difference in autosomal mCH in repetitive (**Figure 7E**) or non-repetitive (**Figure 7F**). There  
497 also were no apparent differences in autosomal mCG patterning across CGI, shores, and shelves  
498 (**Figure 7G**), gene bodies/flanking regions (**Figure 7H**), or CTCF-binding sites/flanking regions  
499 (**Figure 7I**).

#### 500 **Autosome differentially methylated regions (DMRs) by Whole Genome Oxidative Bisulfite 501 Sequencing (WGoBS) in FCG hippocampi.**

502 After exploring the overall levels and patterning of DNA methylation on the autosomes, we called  
503 mCG DMRs using 1 kb non-overlapping windows with minimum average difference of 10%  
504 between at least two groups (Chisq-test, sliding linear model (SLIM)  $q < 0.05$ ) and post-hoc



505 Bonferroni corrected t-tests (XXF v. XYF, XXM v. XYM, XXF v. XXM, XYF v XYM,  $p < \alpha = 0.0125$ )  
506 were used to assess pairwise differences. Using these criteria, we identified 2363 DMRs between  
507 XXF and XYF and 3031 DMRs between XXM and XYM, with 45 common sex chromosomally-  
508 regulated autosomal DMRs (**Figure 8A**). Hierarchical clustering of the DMRs showed three  
509 distinct clusters, with a set of 19 DMRs with higher mCG in XY genotypes (XY >XX), 25 DMRs  
510 with higher mCG in XX genotypes (XX >XY), and 1 discordant DMR (**Figure 8B**).

511 Sex-chromosomally driven autosomal DMRs were enriched in promoter flanking regions,  
512 enhancers, CTCF binding sites, and open chromatin; DMRs were depleted in CGIs, promoters,  
513 and repetitive elements (LINEs, LTRs) (**Figure 8C**). We identified 1055 DMRs between XXF and  
514 XXM and 1228 DMRs between XYF and XYM, with 17 common hormonally-regulated autosomal  
515 DMRs (**Figure 8D**). Hierarchical clustering of the hormonally-regulated DMRs showed three  
516 distinct clusters, with a set of 7 DMRs with higher mCG in females (F > M), 8 DMRs with higher  
517 mCG in XX (XX >XY), and 1 discordant DMR (**Figure 8E**). Similar to the chromosomally-regulated  
518 DMRs, hormonally-regulated DMRs are depleted in CGIs and repetitive elements (LINEs and  
519 LTRs) and enriched in promoter flanking regions (**Figure 8F**). GO Biological Process over-  
520 representation analysis of the autosomal DMRs differentially regulated by sex chromosome  
521 complement (XX v. XY) identified positive regulation of molecular function, trans-synaptic  
522 signaling, and cellular component pathways. Whereas, gonadal sex autosomal DMRs were  
523 overrepresented in lipid phosphorylation, regulation of neuron projection, and neurogenesis.  
524 DMRs differentially regulated by both sex chromosome and gonadal sex were over-represented  
525 in pathways involved in synaptic signaling, cell motility, and neurogenesis (**Figure 8G**). Thus,  
526 despite a strong immune-related transcriptomic signature, differential methylation appears to be  
527 mostly involved in neuron-related pathways. We believe that this is due to the relatively low  
528 percentage of microglia within the brain and warrants further cell-type specific studies focusing  
529 on microglia.

## 530 Discussion

531 The study of sex effects in brain health and disease have begun receiving the needed  
532 experimental attention in neuroscience studies. Not only do the sexual dimorphisms, differences,  
533 and divergences<sup>81</sup> need to be characterized but also the regulatory mechanisms giving rise to  
534 these sex effects. While hormonal mechanisms (both organizational and activational) have been  
535 the most studied, the potential regulation of sex effects by sex chromosomes, either  
536 independently, and in concert with hormones, has received relatively limited attention. Recent  
537 reports however, support the idea that sex chromosomal content is a central regulatory factor<sup>82,83</sup>.

538 To begin characterizing the effects of sex chromosome content on epigenetic regulation of sex  
539 chromosomes and autosomes, this study used the four core genotype (FCG) model<sup>33</sup> to examine  
540 hippocampal DNA modifications and gene expression by gonadal sex (M vs F) and sex  
541 chromosome content (XX vs XY) in roughly one-year old mice.

542 We first localized the translocation of *Sry* to an intergenic region of chromosome 3. This agrees  
543 with prior imaging studies<sup>41</sup> and provides a precise location of the insertion. Importantly we also  
544 found no evidence of other translocation sites in the genome. While there are ~13 copies of *Sry*  
545 insertions of *Sry* they are not within an annotated gene. This could raise concerns about ectopic  
546 *Sry* expression, but no evidence of *Sry* expression in the hippocampus was found, as would be  
547 expected, providing evidence that normal tissue-specific regulation is occurring.

548 After performing paired transcriptomic and DNA methylation sequencing, a number of principle  
549 findings were evident. For gene expression regulation, sex dimorphisms and differences in the  
550 gene expression of X and Y encoded genes are principally driven by sex chromosome content  
551 and not gonadal sex. Autosomally encoded gene expression differences are regulated by both  
552 sex chromosomes and gonadal sex. While in a sense this may not be surprising, we are unaware  
553 of prior data in the brain examining this point. The mechanism for this differential regulation may  
554 lie, in part, in the X chromosome encoded histone demethylase *Kdm6a* and Y- encoded *Uty* and  
555 *Kdm5d* as DEGs were enriched by H3-K27 and H3-K4 demethylation responsiveness. Future  
556 work will need to manipulate individual X- and Y- encoded sexually dimorphic genes in the context  
557 of the FCG model to determine the relative contributions of these to the autoregulation of the sex  
558 chromosomes.

559 Analyses of hippocampal DNA methylation patterns across the XXF, XXM, XYM, and XYF  
560 genome revealed a similar differential effect on autosomes and sex chromosomes. While whole  
561 genome mCG levels did not vary by sex chromosome content or gonadal status, X chromosome  
562 mCG in non-repetitive elements were lower in XYF and XYM compared to XX animals. This lower  
563 level of mCG was also enriched in CpG Islands, promoter regions, and CTCF binding sites of the  
564 X chromosome and likely reflects that XX mice have one inactive X (*Xi*). This interpretation is  
565 bolstered by analysis of differentially methylated regions which are principally higher in XX vs XY  
566 and correlate to mRNA expression of X encoded genes. Importantly this potential inactivation was  
567 unaffected by gonadal status.

568 Conversely non-CpG methylation (mCH) was higher in XY versus XX mice irrespective of gonadal  
569 status. Higher levels of X chromosome mCH have been reported in the liver<sup>66</sup> and have been

570 suggested to indicate Xi escape<sup>84</sup>. As these analyses were performed on tissue homogenates  
571 future studies will need to examine mCH in a cell type specific manner as mCH levels are much  
572 higher in neurons than other CNS cell types<sup>84</sup>.

573 The patterns of autosomal DNA methylation by sex chromosome content and gonadal sex  
574 presented a very different profile. There were no overall differences in mCG or mCH levels.  
575 Rather differentially methylated regions were evident by both sex chromosome content and  
576 gonadal sex. Unlike the X chromosome, differences were not found in CGI regions but were most  
577 enriched in promoter flanking regions. Furthermore, differentially methylated regions were both  
578 higher and lower in comparisons by sex chromosome and gonadal sex unlike in the X  
579 chromosome which were almost uni-directional.

580 Taken together these findings are consistent with the hypothesis that the sex chromosomes have  
581 gonadal sex independent effects on the hippocampal epigenome and transcriptome. The use of  
582 the FCG mouse model allows for this demonstration for the first time in the brain. However, a  
583 number of questions remain to be answered in future studies. These principally consist of further  
584 controlling for gonadal hormone status but analyzing FCG mice that have been gonadectomized  
585 after development ~2-3 months of age. This will control for any activation hormonal differences  
586 between the genotypes. It is worth noting that these studies were conducted in adult mice ~12  
587 months of age.

588 Most importantly for future studies, analysis of specific cell types is needed. The gene expression  
589 and epigenomic differences between neuronal, glial, and other cell types of the CNS is well  
590 described. Examining specific cell populations will increase the signal to noise from future  
591 molecular studies. Further investigation is highly warranted though given the significant effects of  
592 sex chromosome regulation of gene expression and DNA modification patterns in cis of the X  
593 chromosome and in trans of the autosomes.

## 594 **Methods**

### 595 **Animals**

596 All animal procedures were approved by the Institutional Animal Care and Use Committee at the  
597 University of Alabama at Birmingham (UAB) under protocol 21506. Four Core Genotypes mice  
598 on a C57Bl/6J background were obtained from the Jackson Laboratory where they were  
599 revitalized from frozen embryo stocks. Breeder pairs were set up with a XX female and a XY male,  
600 as described in the introduction. Pups were weaned into sex specific cages of 4-5 animals based  
601 on visual inspection of genitalia. Animals were maintained in an AAALAC approved UAB animal

602 facility at 21°C on a 12/12 light/dark cycle (lights on at 6:00am). Animals were provided ad libitum  
603 water and standard mouse chow (NIH31) until time of tissue collection, ~12 months of age for  
604 both males and females. Euthanasia prior to tissue harvesting was carried out by cervical  
605 dislocation followed by rapid decapitation. DNA was extracted from mouse hippocampus samples  
606 for genotyping using the primers: Sry (5'-AGC CCT ACA GCC ACA TGA TA-3', 5'-GTC TTG CCT  
607 GTA TGT GAT GG-3'), Ymt (Y chromosome-specific sequence, 5'-CTG GAG CTC TAC AGT  
608 GAT GA-3', 5'-CAG TTA CCA ATC AAC ACA TCA C-3'), and myogenin (5'-TTA CGT CCA TCG  
609 TGG ACA GCA T-3', 5'-TGG GCT GGG TGT TAG TCT TAT-3')<sup>85</sup>.

### 610 **High molecular weight (HMW) DNA isolation for pseudo long-read genomic sequencing**

611 Hippocampi were dissected from XYF and XYM FCG mice (n=2/group), snap frozen in microfuge  
612 tubes with liquid nitrogen, and stored at -80°C prior to DNA isolation. HMW DNA was extracted  
613 from fresh-frozen tissue according to 10X Genomics sample preparation protocol  
614 ([https://support.10xgenomics.com/genome-exome/sample-prep/doc/demonstrated-protocol-  
615 hmw-dna-extraction-from-fresh-frozen-tissue](https://support.10xgenomics.com/genome-exome/sample-prep/doc/demonstrated-protocol-hmw-dna-extraction-from-fresh-frozen-tissue)). Frozen hippocampus from FCG mice was thawed  
616 on ice and minced with a razor blade. The tissue was gently dounce homogenized in 500 µL of  
617 Nuclei Isolation Buffer (Sigma Nuclei PURE Prep Kit: Lysis Buffer, 1 mM DTT, Sigma Nuclei  
618 PURE Prep Kit: 10% Triton X-100). After a brief centrifugation, the supernatant was transferred  
619 using a wide-bore pipette tip to a 2.0 mL round-bottom tube and centrifuged at 500 x g for 5  
620 minutes. The supernatant was discarded, and pelleted nuclei were then resuspended in 70 µL of  
621 ice-cold PBS. To digest the nuclei, 10 µL of Proteinase K was added to the resuspended nuclei,  
622 followed by 70 µL ice-cold Digestion Buffer (20 mM EDTA, pH 11, 2mM Tris-HCl, pH 8.3, 10 mM  
623 N-Laurylsarcosine sodium salt). Samples were rotated end-over-end for 2 hours at room  
624 temperature. To purify the DNA, Tween-20 was added to the sample to a final concentration of  
625 0.1% and then 1X SPRISelect Reagent was added. The samples were rotated end-over end for  
626 20 min. Tubes were placed in the DynaMag-2 magnetic rack to allow bead capture. After removing  
627 and discarding the supernatant, the beads were washed twice with 70% ethanol. The DNA was  
628 eluted from the beads with 50 µL Sample Elution Buffer (Qiagen AE Buffer, 0.1% Tween-20).  
629 Qubit dsDNA BR kit was used to quantify the DNA.

### 630 **10X Linked-Read Library Preparation**

631 Linked-read genomic libraries Chromium were constructed from 1 ng of HMW DNA from XYF and  
632 XYM (n=2/group) using Chromium Genome Library Prep Kit (#PN-120229, 10X Genomics,  
633 Pleasanton, CA), according to manufacturer's instructions. Briefly, following HMW gDNA

634 extraction 1 ng of HMW DNA was loaded onto a Chromium Genome Chip Kit (#PN-120216, 10X  
635 Genomics) for Gel Bead-in-Emulsions (GEM) generation and barcoding. After SPRISelect bead  
636 cleanup and library construction, libraries were normalized to 4 nM, pooled, and sequenced  
637 NextSeq500 (High PE150) in the OMRF Clinical Genomics Center (CGC).

### 638 **Isolation of DNA/RNA from FCG hippocampi**

639 Hippocampi were dissected from XXF, XXM, XYF, and XYM FCG mice (n=10-16/group), snap  
640 frozen in microfuge tubes with liquid nitrogen, and stored at -80°C prior to DNA isolation. Nucleic  
641 acids (DNA/RNA) were isolated from flash-frozen tissues using the All Prep DNA/RNA Mini Kit  
642 (Qiagen, Germantown, MD) as previously described<sup>86-88</sup>. Briefly, 600 uL of Buffer RLT with beta-  
643 mercaptoethanol was added to the tube containing the frozen hippocampi. A steel bead was  
644 added to the tube and homogenized for 30 s at 30 Hz using a Tissue Lyser II (Qiagen).  
645 Homogenate was loaded onto a DNA spin column and the flow through supplemented with  
646 ethanol was loaded onto an RNA spin column. Columns were washed and nucleic acids eluted  
647 by centrifugation. Total DNA/RNA were quantified by Nanodrop (ThermoFisher Scientific,  
648 Madison, USA). Quality of DNA and RNA were assessed by genomic and RNA screentapes,  
649 respectively, on a TapeStation 2200 (Agilent Technologies, Frankfurt, Germany). Only samples  
650 with RNA and DNA integrity numbers > 7 were used for subsequent experiments.

### 651 **Digital PCR (dPCR) *Sry* copy number assay**

652 Custom *Sry* fluorogenic copy number assays were designed and ordered from Integrated DNA  
653 Technologies (Coralville, IA) (Supplemental table 4). Mouse *Tert* fluorogenic copy number assay  
654 was used as a single copy gDNA control as reference (Life Technologies). DNA from FCG  
655 hippocampi (n=3/group) was used for dPCR, as previously<sup>88</sup>, using the QuantStudio 3D Digital  
656 PCR kit (#A26361, ThermoFisher Scientific), according to manufacturer's instructions. After  
657 combining DNA with the Quantstudio 3D mastermix and *Sry* or *Tert* fluorogenic assay, reactions  
658 were loaded onto a Quantstudio 3D PCR chip with a Quantstudio 3D chip loader (#4482592,  
659 ThermoFisher Scientific) and cycled on a GeneAmp PCR system 9700 with a flatblock attachment.  
660 Chips were read by the Quantstudio 3D chip reader (#4489084, ThermoFisher Scientific) and  
661 analyzed using Quantstudio 3D AnalysisSuite cloud software V3.1.

### 662 **Quantitative PCR (qPCR)**

663 Confirmation of gene expression levels was performed with qPCR as previously described<sup>43,89,90</sup>.  
664 cDNA was synthesized with the ABI High-Capacity cDNA Reverse Transcription Kit (Applied

665 Biosystems Inc., Foster City, CA) from 25ng of purified RNA. qPCR was performed with gene-  
666 specific primer probe fluorogenic exonuclease assays (TaqMan, Life Technologies, Waltham,  
667 MA, **Supplemental table 4**) and the QuantStudio 12K Flex Real-Time PCR System (Applied  
668 Biosystems). Relative gene expression (RQ) was calculated with Expression Suite v 1.0.3  
669 software using the  $2^{-\Delta\Delta Ct}$  analysis method with GAPDH as an endogenous control. Statistical  
670 analysis of the qPCR data was performed using GraphPad Prism 8 (San Diego, CA). Two-way  
671 ANOVA analyses were performed followed by the Tukey's multiple comparison test ( $p < 0.05$ ).

## 672 **Library construction and RNA sequencing (RNA-seq)**

673 Illumina's TruSeq Stranded mRNA Library Prep Kit (#20020594, Illumina) was used on 500 ng of  
674 total RNA for the preparation of strand-specific sequencing libraries according to manufacturer's  
675 guidelines. As previously described<sup>44</sup>, rRNA depletion was performed prior to library construction.

676 RNA was isolated from fresh-frozen hippocampal tissue of 12 mo FCG mice (n=5-6/group), using  
677 Qiagen AllPrep DNA/RNA Mini Kit. After verifying RNA integrity numbers (RIN) with TapeStation  
678 (Agilent) and quantifying RNA with Qubit dsDNA Broad Range Assay kit (Invitrogen), 1 ug of RNA  
679 was used to construct RNA-Seq libraries using the Illumina TruSeq Stranded RNA Library Prep  
680 Kit, following the manufacturer's guidelines. cDNA libraries were sized by TapeStation (Agilent)  
681 and quantified by qPCR (KAPA Biosystems). Libraries were then normalized to 4 nM, pooled,  
682 denatured, and diluted for sequencing on Illumina Hiseq2500 in a 2x100 bp fashion.

## 683 **RNA-Seq Data Analysis**

684 Following sequencing, reads were trimmed, aligned, differential expression statistics and  
685 correlation analyses were performed in Strand NGS software package (Agilent), as previously  
686 described<sup>43</sup>. Reads were aligned against the Mm10 build of the mouse genome (2014.11.26).  
687 Alignment and filtering criteria included: adapter trimming, fixed 2bp trim from 5' and 6bp from 3'  
688 ends, a maximum number of one novel splice allowed per read, a minimum of 90% identity with  
689 the reference sequence, a maximum of 5% gap, trimming of 3' end with Q<30. Alignment was  
690 performed directionally with Read 1 aligned in reverse and Read 2 in forward orientation. Reads  
691 were filtered based on the mapping status and only those reads that aligned normally (in the  
692 appropriate direction) were retained. Normalization was performed with the DESeq algorithm<sup>91</sup>.  
693 Transcripts with an average read count value >20 in at least 100% of the samples in at least one  
694 group were considered expressed at a level sufficient for quantitation per tissue. Those transcripts  
695 below this level were considered not detected/not expressed and excluded, as these low levels  
696 of reads are close to background and are highly variable. A fold change >|1.25| cutoff was used

697 to eliminate those genes which were unlikely to be biologically significant and orthogonally  
698 confirmable due to their very small magnitude of change. For statistical analysis of differential  
699 expression, a two-way ANOVA with the factors of sex chromosome complement and gonadal sex  
700 and a Benjamini-Hochberg Multiple Testing Correction followed by Student-Newman Keuls post  
701 hoc test were used. Visualizations of hierarchical clustering and principal components analysis  
702 were performed in Strand Next Generation Analysis Software (NGS) (Version 3.1, Bangalore,  
703 India). The entirety of the sequencing data is available for download in FASTQ format from NCBI  
704 Sequence Read Archive (GEOXXXX).

### 705 **Library construction and oxidative bisulfite sequencing (OxBS-seq)**

706 DNA was isolated from fresh-frozen hippocampal tissue of 12 mo FCG mice (n=3/group), using  
707 Qiagen AllPrep DNA/RNA Mini Kit. Whole genome oxidative bisulfite sequencing libraries were  
708 prepared according to manufacturers guidelines (Ovation Ultralow Methyl-Seq Library System,  
709 Tecan Genomics, Inc., Redwood City, CA) as previously described<sup>43,92</sup>. Briefly, 1 µg of gDNA in  
710 50 µl 1X low-EDTA TE buffer was sheared with a Covaris E220 sonicator (Covaris, Inc., Woburn,  
711 MA) to an average of 200 base pairs. Sheared products were sized by capillary electrophoresis  
712 (DNA HSD1000, Agilent) and cleaned using an Agencourt bead-based purification protocol. After  
713 quantifying (Qubit dsDNA, ThermoFisher Scientific) the cleaned DNA, 200 ng gDNA fragments  
714 were prepared in a 12 µl volume to which 1µl of spike-in control DNA (0.08 ng/ul) with known  
715 levels of specific mC, hmC, and fC at individual sites was added. End repair, ligation of  
716 methylated adaptors (#L2V11DR-BC 1-96 adaptor plate, Tecan Genomics) and final repair were  
717 performed according to manufacturer's instructions. Normalized DNA was oxidized and then  
718 bisulfite- converted with the True Methyl oxBS module (NuGEN) with desulfonation and  
719 purification. 22 µl of libraries were eluted from the magnetic beads. qPCR was used to determine  
720 the number (N) of PCR cycles required for library amplification. Oxidative bisulfite-converted  
721 samples were amplified for 13 cycles [95° C- 2 min, N (95°C-15 s, 60°C-1 min, 72° C-30s)].  
722 Amplified libraries were purified with Agencourt beads and eluted in low-EDTA TE buffer. Capillary  
723 electrophoresis (TapeStation HSD1000, Agilent) was used to validate and quantify libraries.  
724 Amplified libraries were normalized to a concentration of 4 nM and pooled, denatured, and diluted  
725 to 12 pM for sequencing on NovaSeq 6000 (Illumina) according to manufacturer's guidelines with  
726 the exception of a custom sequencing primer (MetSeq Primer) that was spiked in with the Illumina  
727 Read 1 primer to a final concentration of 0.5 µM.

### 728 **OxBS-seq data analysis**

729 Global levels of mCG, hmCG, and mCH were analyzed as previously described<sup>43,92</sup> Before  
730 aligning, paired-end reads were adaptor-trimmed and filtered using Trimmomatic<sup>93</sup> 0.35. End-  
731 trimming removed leading and trailing bases with Q-score<25, cropped 4 bases from the start of  
732 the read, dropped reads less than 25 bases long, and dropped reads with average Q-score<25.  
733 Unpaired reads after trimming were not considered for alignment. Alignment of trimmed OxBS-  
734 converted sequences was carried out using Bismark<sup>94</sup> 0.16.3 with Bowtie 2<sup>95</sup> against the mouse  
735 reference genome (GRCm38/mm10). Bams were de-duplicated using Bismark. Methylation call  
736 percentages for each CpG and non-CpG (CH) site within the genome were calculated by dividing  
737 the methylated counts over the total counts for that site in the oxidative bisulfite - converted  
738 libraries (OXBS). Genome-wide CpG and CH methylation levels were calculated separately. BAM  
739 files generated during alignment were run through MethylKit in R<sup>96</sup> to generate context-specific  
740 (CpG/CH) coverage text files. Bisulfite conversion efficiency for C, mC, and hmC was estimated  
741 using CEGX spike-in control sequences. Untrimmed fastq files were run through CEGX QC v0.2,  
742 which output a fastqc\_data.txt file containing the conversion mean for C, mC, and hmC.

#### 743 **DMR Analysis**

744 CpG text files were read into methylKit v XXXX and converted to an object. The mouse genome  
745 was tiled in 200 nt non-overlapping windows. Each window was filtered for a minimum count of  
746 10. Samples were then united and compared for windows covered in all samples. Differentially  
747 methylated regions (DMRs) were called using default parameters. DMRs were filtered to  
748 differences that were >5% different between at least two groups and had a SLIM-generated q-  
749 value less than 0.05. There were 13010 windows that met these criteria. The methylDiff object  
750 was intersected with the methylBase object to calculate the % methylation for each window that  
751 passed the described filtering. Next, 4 pairwise t-tests (XXF v XYF, XXM v XYM, XXF v XXM,  
752 XYF v. XYM) were conducted and corrected for the four comparisons using BHMTc and an  
753 alpha<0.05.

754



755   References

- 756   1.     Yagi, S. & Galea, L.A.M. Sex differences in hippocampal cognition and neurogenesis.  
757         *Neuropsychopharmacology* **44**, 200-213 (2019).
- 758   2.     Eggers, S. & Sinclair, A. Mammalian sex determination-insights from humans and mice.  
759         *Chromosome Res* **20**, 215-238 (2012).
- 760   3.     Phoenix, C.H., Goy, R.W., Gerall, A.A. & Young, W.C. Organizing action of prenatally  
761         administered testosterone propionate on the tissues mediating mating behavior in the female  
762         guinea pig. *Endocrinology* **65**, 369-382 (1959).
- 763   4.     Moghadami, S., Jahanshahi, M., Sepehri, H. & Amini, H. Gonadectomy reduces the density of  
764         androgen receptor-immunoreactive neurons in male rat's hippocampus: testosterone  
765         replacement compensates it. *Behavioral and Brain Functions* **12**, 5 (2016).
- 766   5.     Kokras, N., *et al.* Sex differences in behavioral and neurochemical effects of gonadectomy and  
767         aromatase inhibition in rats. *Psychoneuroendocrinology* **87**, 93-107 (2018).
- 768   6.     Farquhar, C.E., *et al.* Sex, THC, and hormones: Effects on density and sensitivity of CB(1)  
769         cannabinoid receptors in rats. *Drug Alcohol Depend* **194**, 20-27 (2019).
- 770   7.     Mitsushima, D., Takase, K., Takahashi, T. & Kimura, F. Activational and organisational effects of  
771         gonadal steroids on sex-specific acetylcholine release in the dorsal hippocampus. *J*  
772         *Neuroendocrinol* **21**, 400-405 (2009).
- 773   8.     Wu, Y.C., Du, X., van den Buuse, M. & Hill, R.A. Sex differences in the adolescent developmental  
774         trajectory of parvalbumin interneurons in the hippocampus: a role for estradiol.  
775         *Psychoneuroendocrinology* **45**, 167-178 (2014).
- 776   9.     Ramzan, F., Azam, A.B., Monks, D.A. & Zovkic, I.B. Androgen receptor is a negative regulator of  
777         contextual fear memory in male mice. *Horm Behav* **106**, 10-18 (2018).
- 778   10.    McQueen, J.K., Dow, R.C. & Fink, G. Gonadal steroids regulate number of astrocytes  
779         immunostained for glial fibrillary acidic protein in mouse hippocampus. *Mol Cell Neurosci* **3**, 482-  
780         486 (1992).
- 781   11.    Arnold, A.P. Conceptual frameworks and mouse models for studying sex differences in  
782         physiology and disease: why compensation changes the game. *Exp Neurol* **259**, 2-9 (2014).
- 783   12.    Mulnard, R.A., *et al.* Estrogen Replacement Therapy for Treatment of Mild to Moderate  
784         Alzheimer Disease A Randomized Controlled Trial. *JAMA* **283**, 1007-1015 (2000).
- 785   13.    Fang, H., Disteche, C.M. & Berletch, J.B. X Inactivation and Escape: Epigenetic and Structural  
786         Features. *Front Cell Dev Biol* **7**, 219 (2019).
- 787   14.    Knickmeyer, R.C. & Davenport, M. Turner syndrome and sexual differentiation of the brain:  
788         implications for understanding male-biased neurodevelopmental disorders. *J Neurodev Disord* **3**,  
789         293-306 (2011).
- 790   15.    Harris, V.M., *et al.* Klinefelter's syndrome (47,XXY) is in excess among men with Sjogren's  
791         syndrome. *Clin Immunol* **168**, 25-29 (2016).
- 792   16.    Arnold, A.P. A general theory of sexual differentiation. *Journal of Neuroscience Research* **95**,  
793         291-300 (2017).
- 794   17.    Panning, B. X-chromosome inactivation: the molecular basis of silencing. *Journal of Biology* **7**, 30  
795         (2008).
- 796   18.    Fang, H., Disteche, C.M. & Berletch, J.B. X Inactivation and Escape: Epigenetic and Structural  
797         Features. *Front Cell Dev Biol* **7**, 219-219 (2019).
- 798   19.    Carrel, L. & Willard, H.F. X-inactivation profile reveals extensive variability in X-linked gene  
799         expression in females. *Nature* **434**, 400-404 (2005).
- 800   20.    Berletch, J.B., Yang, F., Xu, J., Carrel, L. & Disteche, C.M. Genes that escape from X inactivation.  
801         *Human Genetics* **130**, 237-245 (2011).

- 802 21. Mousavi, M.J., Mahmoudi, M. & Ghotloo, S. Escape from X chromosome inactivation and female  
803 bias of autoimmune diseases. *Molecular Medicine* **26**, 127 (2020).
- 804 22. Youness, A., Miquel, C.-H. & Guéry, J.-C. Escape from X Chromosome Inactivation and the  
805 Female Predominance in Autoimmune Diseases. *Int J Mol Sci* **22**, 1114 (2021).
- 806 23. Bajic, V.P., *et al.* The X Files: "The Mystery of X Chromosome Instability in Alzheimer's Disease".  
807 *Front Genet* **10**, 1368-1368 (2020).
- 808 24. Mangold, C.A., *et al.* CNS-wide Sexually Dimorphic Induction of the Major Histocompatibility  
809 Complex 1 Pathway With Aging. *The Journals of Gerontology: Series A* **72**, 16-29 (2017).
- 810 25. Masser, D.R., *et al.* Sexually divergent DNA methylation patterns with hippocampal aging. *Aging*  
811 *Cell* **16**, 1342-1352 (2017).
- 812 26. Vied, C., *et al.* Transcriptomic analysis of the hippocampus from six inbred strains of mice  
813 suggests a basis for sex-specific susceptibility and severity of neurological disorders. *J Comp*  
814 *Neurol* **524**, 2696-2710 (2016).
- 815 27. Bundy, J.L., Vied, C. & Nowakowski, R.S. Sex differences in the molecular signature of the  
816 developing mouse hippocampus. *BMC Genomics* **18**, 237-237 (2017).
- 817 28. Xia, Y., *et al.* Sex-differential DNA methylation and associated regulation networks in human  
818 brain implicated in the sex-biased risks of psychiatric disorders. *Mol Psychiatry* **26**, 835-848  
819 (2021).
- 820 29. Arnold, A.P. Mouse models for evaluating sex chromosome effects that cause sex differences in  
821 non-gonadal tissues. *J Neuroendocrinol* **21**, 377-386 (2009).
- 822 30. De Vries, G.J., *et al.* A model system for study of sex chromosome effects on sexually dimorphic  
823 neural and behavioral traits. *J Neurosci* **22**, 9005-9014 (2002).
- 824 31. Markham, J.A., *et al.* Sex differences in mouse cortical thickness are independent of the  
825 complement of sex chromosomes. *Neuroscience* **116**, 71-75 (2003).
- 826 32. Wagner, C.K., *et al.* Neonatal mice possessing an Sry transgene show a masculinized pattern of  
827 progesterone receptor expression in the brain independent of sex chromosome status.  
828 *Endocrinology* **145**, 1046-1049 (2004).
- 829 33. Arnold, A.P. & Chen, X. What does the "four core genotypes" mouse model tell us about sex  
830 differences in the brain and other tissues? *Front Neuroendocrinol* **30**, 1-9 (2009).
- 831 34. Carruth, L.L., Reisert, I. & Arnold, A.P. Sex chromosome genes directly affect brain sexual  
832 differentiation. *Nat Neurosci* **5**, 933-934 (2002).
- 833 35. Gioiosa, L., *et al.* Sex chromosome complement affects nociception in tests of acute and chronic  
834 exposure to morphine in mice. *Horm Behav* **53**, 124-130 (2008).
- 835 36. Chen, X., *et al.* Sex difference in neural tube defects in p53-null mice is caused by differences in  
836 the complement of X not Y genes. *Dev Neurobiol* **68**, 265-273 (2008).
- 837 37. Smith-Bouvier, D.L., *et al.* A role for sex chromosome complement in the female bias in  
838 autoimmune disease. *J Exp Med* **205**, 1099-1108 (2008).
- 839 38. Davis, E.J., Lobach, I. & Dubal, D.B. Female XX sex chromosomes increase survival and extend  
840 lifespan in aging mice. *Aging Cell* **18**, e12871-e12871 (2019).
- 841 39. Davis, E.J., *et al.* A second X chromosome contributes to resilience in a mouse model of  
842 Alzheimer's disease. *Science Translational Medicine* **12**, eaaz5677 (2020).
- 843 40. Kashimada, K. & Koopman, P. *Sry*: the master switch in mammalian sex  
844 determination. *Development* **137**, 3921-3930 (2010).
- 845 41. Itoh, Y., *et al.* Four core genotypes mouse model: localization of the Sry transgene and bioassay  
846 for testicular hormone levels. *BMC Res Notes* **8**, 69 (2015).
- 847 42. Bundy, J.L., Vied, C. & Nowakowski, R.S. Sex differences in the molecular signature of the  
848 developing mouse hippocampus. *BMC Genomics* **18**, 237 (2017).

- 849 43. Chucair-Elliott, A.J., *et al.* Tamoxifen induction of Cre recombinase does not cause long-lasting or  
850 sexually divergent responses in the CNS epigenome or transcriptome: implications for the design  
851 of aging studies. *GeroScience* (2019).
- 852 44. Hadad, N., Masser, D.R., Blanco-Berdugo, L., Stanford, D.R. & Freeman, W.M. Early-life DNA  
853 methylation profiles are indicative of age-related transcriptome changes. *Epigenetics Chromatin*  
854 **12**, 58 (2019).
- 855 45. Berletch, J.B., *et al.* Escape from X Inactivation Varies in Mouse Tissues. *PLOS Genetics* **11**,  
856 e1005079 (2015).
- 857 46. Snijders Blok, L., *et al.* Mutations in DDX3X Are a Common Cause of Unexplained Intellectual  
858 Disability with Gender-Specific Effects on Wnt Signaling. *Am J Hum Genet* **97**, 343-352 (2015).
- 859 47. Hu, H., *et al.* X-exome sequencing of 405 unresolved families identifies seven novel intellectual  
860 disability genes. *Mol Psychiatry* **21**, 133-148 (2016).
- 861 48. Shpargel, K.B., Sengoku, T., Yokoyama, S. & Magnuson, T. UTX and UTY Demonstrate Histone  
862 Demethylase-Independent Function in Mouse Embryonic Development. *PLOS Genetics* **8**,  
863 e1002964 (2012).
- 864 49. Cerase, A., Pintacuda, G., Tattermusch, A. & Avner, P. Xist localization and function: new insights  
865 from multiple levels. *Genome Biology* **16**, 166 (2015).
- 866 50. Mizukami, H., *et al.* KDM5D-mediated H3K4 demethylation is required for sexually dimorphic  
867 gene expression in mouse embryonic fibroblasts. *J Biochem* **165**, 335-342 (2019).
- 868 51. Ramathal, C., *et al.* DDX3Y gene rescue of a Y chromosome AZFa deletion restores germ cell  
869 formation and transcriptional programs. *Scientific Reports* **5**, 15041 (2015).
- 870 52. Marks, H., *et al.* High-resolution analysis of epigenetic changes associated with X inactivation.  
871 *Genome Res* **19**, 1361-1373 (2009).
- 872 53. Tate, P.H. & Bird, A.P. Effects of DNA methylation on DNA-binding proteins and gene expression.  
873 *Curr Opin Genet Dev* **3**, 226-231 (1993).
- 874 54. Jones, P.L., *et al.* Methylated DNA and MeCP2 recruit histone deacetylase to repress  
875 transcription. *Nat Genet* **19**, 187-191 (1998).
- 876 55. Watanabe, S., *et al.* Methylated DNA-binding domain 1 and methylpurine-DNA glycosylase link  
877 transcriptional repression and DNA repair in chromatin. *Proc Natl Acad Sci U S A* **100**, 12859-  
878 12864 (2003).
- 879 56. Fujita, N., *et al.* Methyl-CpG binding domain 1 (MBD1) interacts with the Suv39h1-HP1  
880 heterochromatic complex for DNA methylation-based transcriptional repression. *J Biol Chem*  
881 **278**, 24132-24138 (2003).
- 882 57. Brackertz, M., Boeke, J., Zhang, R. & Renkawitz, R. Two highly related p66 proteins comprise a  
883 new family of potent transcriptional repressors interacting with MBD2 and MBD3. *J Biol Chem*  
884 **277**, 40958-40966 (2002).
- 885 58. Razin, A. & Cedar, H. DNA methylation and genomic imprinting. *Cell* **77**, 473-476 (1994).
- 886 59. Wolf, S.F., Jolly, D.J., Lunnen, K.D., Friedmann, T. & Migeon, B.R. Methylation of the  
887 hypoxanthine phosphoribosyltransferase locus on the human X chromosome: implications for X-  
888 chromosome inactivation. *Proceedings of the National Academy of Sciences* **81**, 2806-2810  
889 (1984).
- 890 60. Pfeifer, G.P., Steigerwald, S.D., Hansen, R.S., Gartler, S.M. & Riggs, A.D. Polymerase Chain  
891 Reaction-Aided Genomic Sequencing of an X Chromosome- Linked CpG Island: Methylation  
892 Patterns Suggest Clonal Inheritance, CpG Site Autonomy, and an Explanation of Activity State  
893 Stability. *Proc Natl Acad Sci U S A* **87**, 8252-8256 (1990).
- 894 61. Bartlett, M.H., Adra, C.N., Park, J., Chapman, V.M. & McBurney, M.W. DNA methylation of two X  
895 chromosome genes in female somatic and embryonal carcinoma cells. *Somatic Cell and*  
896 *Molecular Genetics* **17**, 35-47 (1991).

- 897 62. Angrisano, T., *et al.* TACC3 mediates the association of MBD2 with histone acetyltransferases  
898 and relieves transcriptional repression of methylated promoters. *Nucleic Acids Res* **34**, 364-372  
899 (2006).
- 900 63. Sharp, A.J., *et al.* DNA methylation profiles of human active and inactive X chromosomes.  
901 *Genome Res* **21**, 1592-1600 (2011).
- 902 64. Chucair-Elliott, A.J., *et al.* Tamoxifen induction of Cre recombinase does not cause long-lasting or  
903 sexually divergent responses in the CNS epigenome or transcriptome: implications for the design  
904 of aging studies. *Geroscience* **41**, 691-708 (2019).
- 905 65. Jeziorska, D.M., *et al.* DNA methylation of intragenic CpG islands depends on their  
906 transcriptional activity during differentiation and disease. *Proceedings of the National Academy  
907 of Sciences* **114**, E7526-E7535 (2017).
- 908 66. Duncan, C.G., *et al.* Dosage compensation and DNA methylation landscape of the X chromosome  
909 in mouse liver. *Scientific Reports* **8**, 10138 (2018).
- 910 67. Kung, J.T., *et al.* Locus-specific targeting to the X chromosome revealed by the RNA interactome  
911 of CTCF. *Mol Cell* **57**, 361-375 (2015).
- 912 68. Cortes, L.R., Cisternas, C.D. & Forger, N.G. Does Gender Leave an Epigenetic Imprint on the  
913 Brain? *Frontiers in Neuroscience* **13**(2019).
- 914 69. Davey, R.A. & Grossmann, M. Androgen Receptor Structure, Function and Biology: From Bench  
915 to Bedside. *Clin Biochem Rev* **37**, 3-15 (2016).
- 916 70. Atwi, S., McMahon, D., Scharfman, H. & MacLusky, N.J. Androgen Modulation of Hippocampal  
917 Structure and Function. *Neuroscientist* **22**, 46-60 (2016).
- 918 71. Kawasaki, T. & Kawai, T. Toll-like receptor signaling pathways. *Front Immunol* **5**, 461 (2014).
- 919 72. Zhang, Y., *et al.* An RNA-Sequencing Transcriptome and Splicing Database of Glia, Neurons, and  
920 Vascular Cells of the Cerebral Cortex. *The Journal of Neuroscience* **34**, 11929 (2014).
- 921 73. Hikmet, F., *et al.* The protein expression profile of ACE2 in human tissues. *Molecular Systems  
922 Biology* **16**, e9610 (2020).
- 923 74. Blank, T. & Prinz, M. Type I interferon pathway in CNS homeostasis and neurological disorders.  
924 *Glia* **65**, 1397-1406 (2017).
- 925 75. Roy, E.R., *et al.* Type I interferon response drives neuroinflammation and synapse loss in  
926 Alzheimer disease. *The Journal of Clinical Investigation* **130**, 1912-1930 (2020).
- 927 76. Honda, K., *et al.* IRF-7 is the master regulator of type-I interferon-dependent immune responses.  
928 *Nature* **434**, 772-777 (2005).
- 929 77. Liu, X.-Y., Chen, W., Wei, B., Shan, Y.-F. & Wang, C. IFN-Induced TPR Protein IFIT3 Potentiates  
930 Antiviral Signaling by Bridging MAVS and TBK1. *The Journal of Immunology* **187**, 2559 (2011).
- 931 78. Schettters, S.T.T., Gomez-Nicola, D., Garcia-Vallejo, J.J. & Van Kooyk, Y. Neuroinflammation:  
932 Microglia and T Cells Get Ready to Tango. *Front Immunol* **8**, 1905 (2017).
- 933 79. VanGuilder Starkey, H.D., *et al.* Neuroglial expression of the MHCI pathway and PirB receptor is  
934 upregulated in the hippocampus with advanced aging. *J Mol Neurosci* **48**, 111-126 (2012).
- 935 80. Mangold, C.A., *et al.* CNS-wide Sexually Dimorphic Induction of the Major Histocompatibility  
936 Complex 1 Pathway With Aging. *J Gerontol A Biol Sci Med Sci* **72**, 16-29 (2017).
- 937 81. McCarthy, M.M., Arnold, A.P., Ball, G.F., Blaustein, J.D. & De Vries, G.J. Sex differences in the  
938 brain: the not so inconvenient truth. *J Neurosci* **32**, 2241-2247 (2012).
- 939 82. Davis, E.J., *et al.* A second X chromosome contributes to resilience in a mouse model of  
940 Alzheimer's disease. *Sci Transl Med* **12**(2020).
- 941 83. Qi, S., *et al.* X chromosome escapee genes are involved in ischemic sexual dimorphism through  
942 epigenetic modification of inflammatory signals. *J Neuroinflammation* **18**, 70 (2021).
- 943 84. Lister, R., *et al.* Global epigenomic reconfiguration during mammalian brain development.  
944 *Science* **341**, 1237905 (2013).

- 945 85. Coppe, J.P., Desprez, P.Y., Krtolica, A. & Campisi, J. The senescence-associated secretory  
946 phenotype: the dark side of tumor suppression. *Annu Rev Pathol* **5**, 99-118 (2010).
- 947 86. Ansere, V.A., *et al.* Cellular hallmarks of aging emerge in the ovary prior to primordial follicle  
948 depletion. *Mech Ageing Dev* **194**, 111425 (2021).
- 949 87. Masser, D.R., Berg, A.S. & Freeman, W.M. Focused, high accuracy 5-methylcytosine quantitation  
950 with base resolution by benchtop next-generation sequencing. *Epigenetics & chromatin* **6**, 33-33  
951 (2013).
- 952 88. Masser, D.R., Clark, N.W., Van Remmen, H. & Freeman, W.M. Loss of the antioxidant enzyme  
953 CuZnSOD (Sod1) mimics an age-related increase in absolute mitochondrial DNA copy number in  
954 the skeletal muscle. *Age (Dordr)* **38**, 323-333 (2016).
- 955 89. Simpson, J.T., *et al.* Detecting DNA cytosine methylation using nanopore sequencing. *Nature*  
956 *Methods* **14**, 407 (2017).
- 957 90. Masser, D.R., *et al.* Hippocampal subregions exhibit both distinct and shared transcriptomic  
958 responses to aging and nonneurodegenerative cognitive decline. *J Gerontol A Biol Sci Med Sci*  
959 **69**, 1311-1324 (2014).
- 960 91. Anders, S. & Huber, W. Differential expression analysis for sequence count data. *Genome Biol*  
961 **11**, R106 (2010).
- 962 92. Chucair-Elliott, A.J., *et al.* Inducible cell-specific mouse models for paired epigenetic and  
963 transcriptomic studies of microglia and astroglia. *Communications Biology* **3**, 693 (2020).
- 964 93. Bolger, A.M., Lohse, M. & Usadel, B. Trimmomatic: a flexible trimmer for Illumina sequence  
965 data. *Bioinformatics* **30**, 2114-2120 (2014).
- 966 94. Krueger, F. & Andrews, S.R. Bismark: a flexible aligner and methylation caller for Bisulfite-Seq  
967 applications. *Bioinformatics* **27**, 1571-1572 (2011).
- 968 95. Langmead, B. & Salzberg, S.L. Fast gapped-read alignment with Bowtie 2. *Nat Methods* **9**, 357-  
969 359 (2012).
- 970 96. Akalin, A., *et al.* methylKit: a comprehensive R package for the analysis of genome-wide DNA  
971 methylation profiles. *Genome Biol* **13**, R87 (2012).

972

973 **Author contributions**

974 Sarah R. Ocañas: first author, design of the study, execution of experiments, data acquisition,  
975 analysis, and interpretation, figure generation, manuscript writing and preparation

976 Victor A. Ansere: execution of experiments, data acquisition, analysis, and interpretation, figure  
977 generation, manuscript preparation

978 Kyla B. Tooley: execution of experiments, data acquisition, analysis, and interpretation, figure  
979 generation, manuscript preparation

980 Niran Hadad: data analysis and interpretation, figure generation

981 Ana J. Chucair-Elliott: design of the study, data interpretation, manuscript preparation

982 David R. Stanford: design of the study, data analysis and interpretation

983 Shannon Rice: execution of experiments, data acquisition, analysis, and interpretation

984 Benjamin Wronowski: execution of experiments, data acquisition, analysis, and interpretation,  
985 figure generation

986 Jessica M. Hoffman: design of the study, execution of experiments, data analysis and  
987 interpretation, manuscript writing and preparation

988 Steven N. Austad: design of the study, data analysis and interpretation, manuscript writing and  
989 preparation

990 Michael B. Stout: design of the study, execution of experiments, data acquisition, analysis, and  
991 interpretation, manuscript writing and preparation

992 Willard M. Freeman: Corresponding author, design of the study, data analysis and  
993 interpretation, figure generation, manuscript writing, preparation, and submission.

994 **Competing Interest statements**

995 Sarah R. Ocañas: None

996 Victor A. Ansere: None

997 Kyla B. Tooley: None

998 Niran Hadad: None

999 Ana J. Chucair-Elliott: None

1000 David R. Stanford: None

1001 Shannon Rice: None

1002 Benjamin Wronowski: None

1003 Jessica M. Hoffman: None

1004 Steven N. Austad: None

1005 Michael B. Stout: None

1006 Willard M. Freeman: None

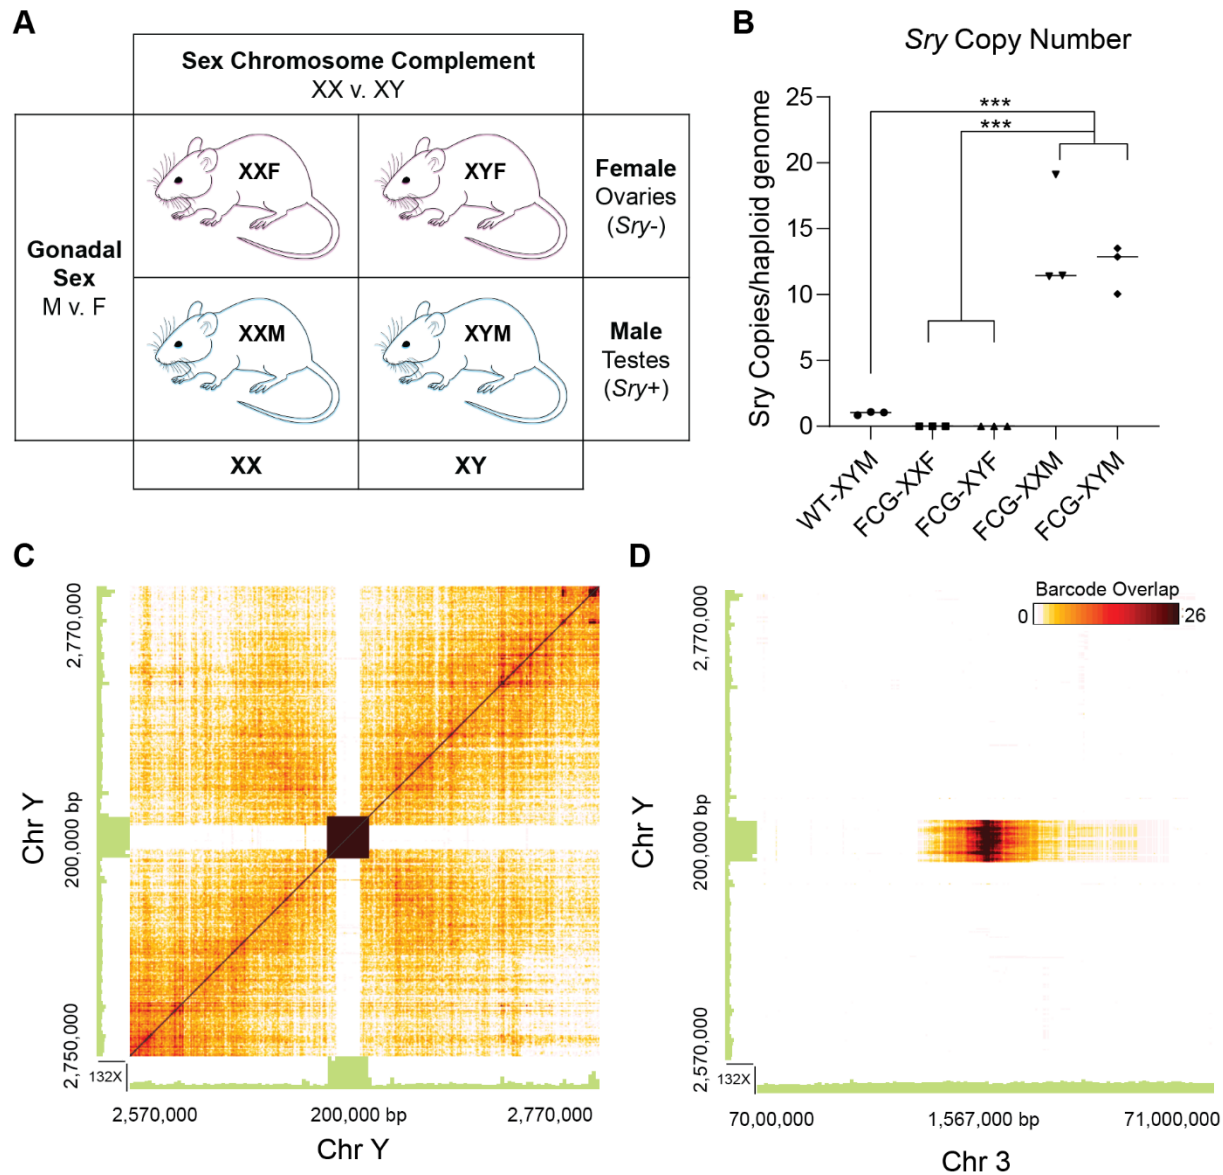

1007

1008 **Figure 1. Sry copy number and localization in FCG hippocampi.** DNA isolated from FCG and wild type  
 1009 hippocampi (n=3/group) was used for digital PCR *Sry* copy number and 10X genomics linked read  
 1010 sequencing. A) FCG “sex-reversal” mouse model two-way design to study hormonal and chromosomal  
 1011 contributions to sex effects. B) Wildtype (WT) C57BL/6 mice have one copy of the testis-determining *Sry*  
 1012 gene, while FCG males (both XX and XY) have 12-14 copies of *Sry*. *Sry* was not detected in the FCG females.  
 1013 C) Linked read sequencing of FCG XYM, shows strong linkage of the *Sry* gene to itself, but not to adjacent  
 1014 regions of the Y chromosome (Chr Y). D) *Sry* gene shows strong linkage to a region on Chromosome 3 (Chr  
 1015 3).



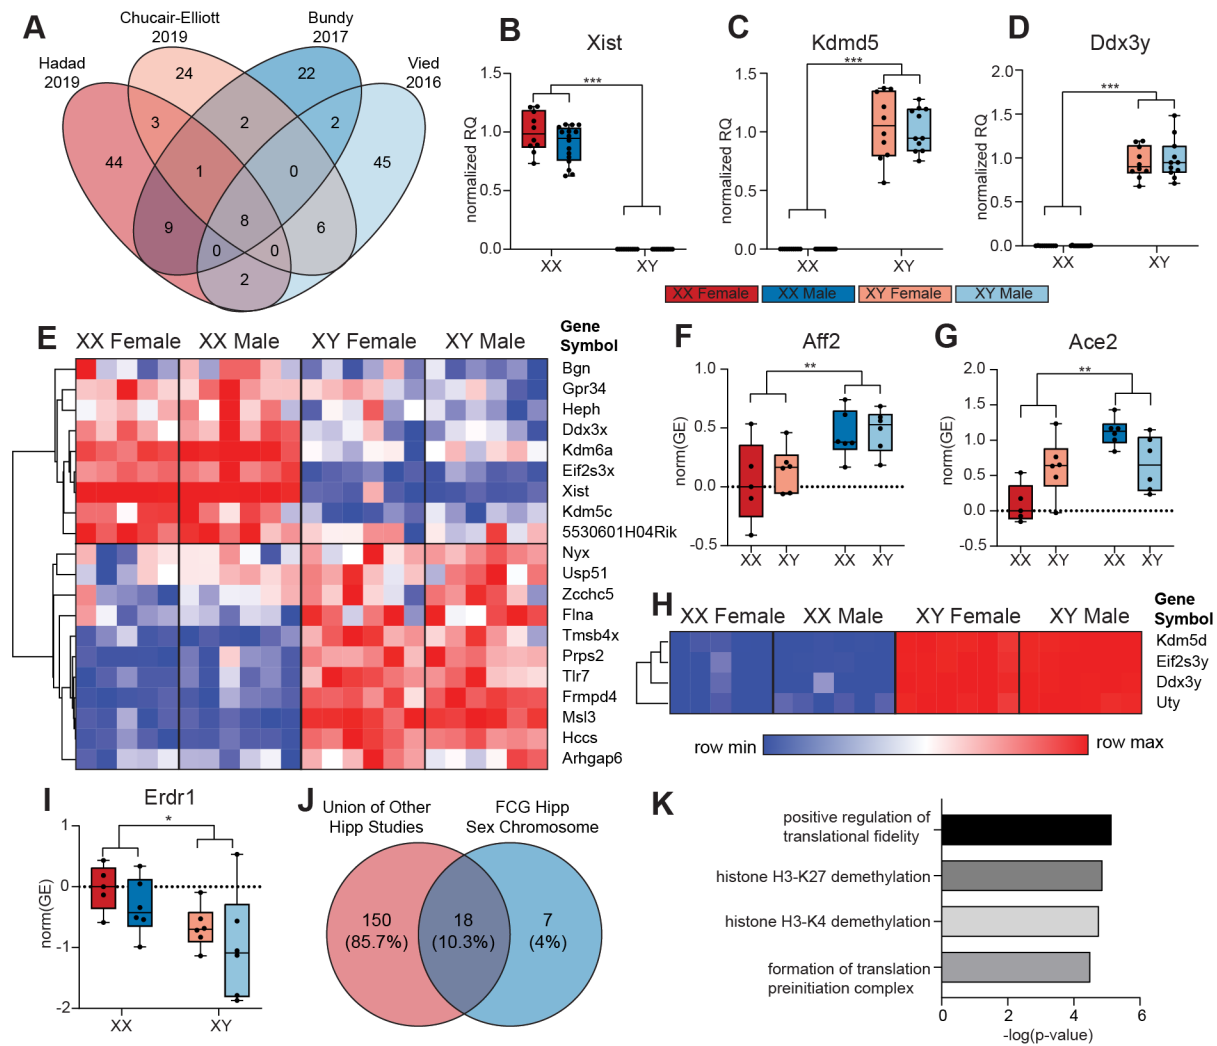

1016

1017 **Figure 2. Transcriptomic analysis of sex chromosomal driven differential expression of sex**  
 1018 **chromosome encoded genes in adult FCG hippocampi.** DNA and RNA were isolated from FCG  
 1019 hippocampi (n=10-16/group). mRNA expression was assessed by RT-qPCR (n=10-16/group) and stranded  
 1020 RNA-Seq (n=6/group). Results were compared to previously published hippocampal transcriptomic sex  
 1021 differences. **Boxplots** represent median, interquartile range, and minimum/maximum normalized gene  
 1022 expression. A) Comparison of four previous hippocampal transcriptomic studies, shows 168 sex  
 1023 chromosome-encoded sex differences in wild-type mice across studies with eight genes common between  
 1024 all studies (*Xist*, *Ddx3x*, *Kdm6a*, *Eif2s3x*, *Kdm5d*, *Eif2s3y*, *Uty*, *Ddx3y*) B) In the FCG hippocampus, RT-  
 1025 qPCR of X-chromosome encoded gene *Xist* confirms differential expression by sex chromosome (XX vs.  
 1026 XY) but not sex (M v. F) (Two-way ANOVA, main effect of sex-chromosome complement (XX v. XY),  
 1027 \*\*\*p < 0.001) . C-D) RT-qPCR of Y-chromosome encoded genes shows similar levels of expression of (C)  
 1028 *Kdm5d* and (D) *Ddx3y* in XYM and XYF, and no detectable expression in XXM or XXF (Two-way ANOVA,  
 1029 main effect of sex-chromosome complement (XX v. XY), \*\*\*p < 0.001). E) RNA-Seq analysis of X-  
 1030 chromosome encoded genes showed 20 genes that are differentially expressed by sex chromosome (XX  
 1031 vs. XY) but not by sex (M v. F). F-G) RNA-seq analysis of X chromosome genes revealed only two genes  
 1032 (*Aff2*, *Ace2*) differentially expressed by sex (M v. F) and not by sex chromosome complement. Both (F) *Aff2*  
 1033 and (G) *Ace2* had higher expression in males than females regardless of their sex chromosome (Two-way  
 1034 ANOVA, main effect of gonadal sex (M v. F), \*\*p < 0.01). H-I) RNA-Seq analysis of Y chromosome encoded  
 1035 genes identified 5 differentially expressed genes by sex chromosome (XX vs. XY) but not by sex (M v. F).

1036 There were no Y chromosome genes that were differentially expressed by sex (M v. F). H) Four of the  
1037 genes (*Kdm5d*, *Eif2s3y*, *Ddx3y*, *Uty*) show no expression in XX genotypes. I) Located in the pseudo  
1038 autosomal region (PAR) of the X/Y-chromosomes, *Erd1* shows higher expression in XX genotype. J)  
1039 Comparing the union of previous hippocampal studies described in (A) to the FCG sex chromosome genes  
1040 differentially expressed between XX and XY genotypes, yields 18 common genes. K) GO Ontology analysis  
1041 of the 18 genes from (J), identified four significantly enriched biological pathways

1042

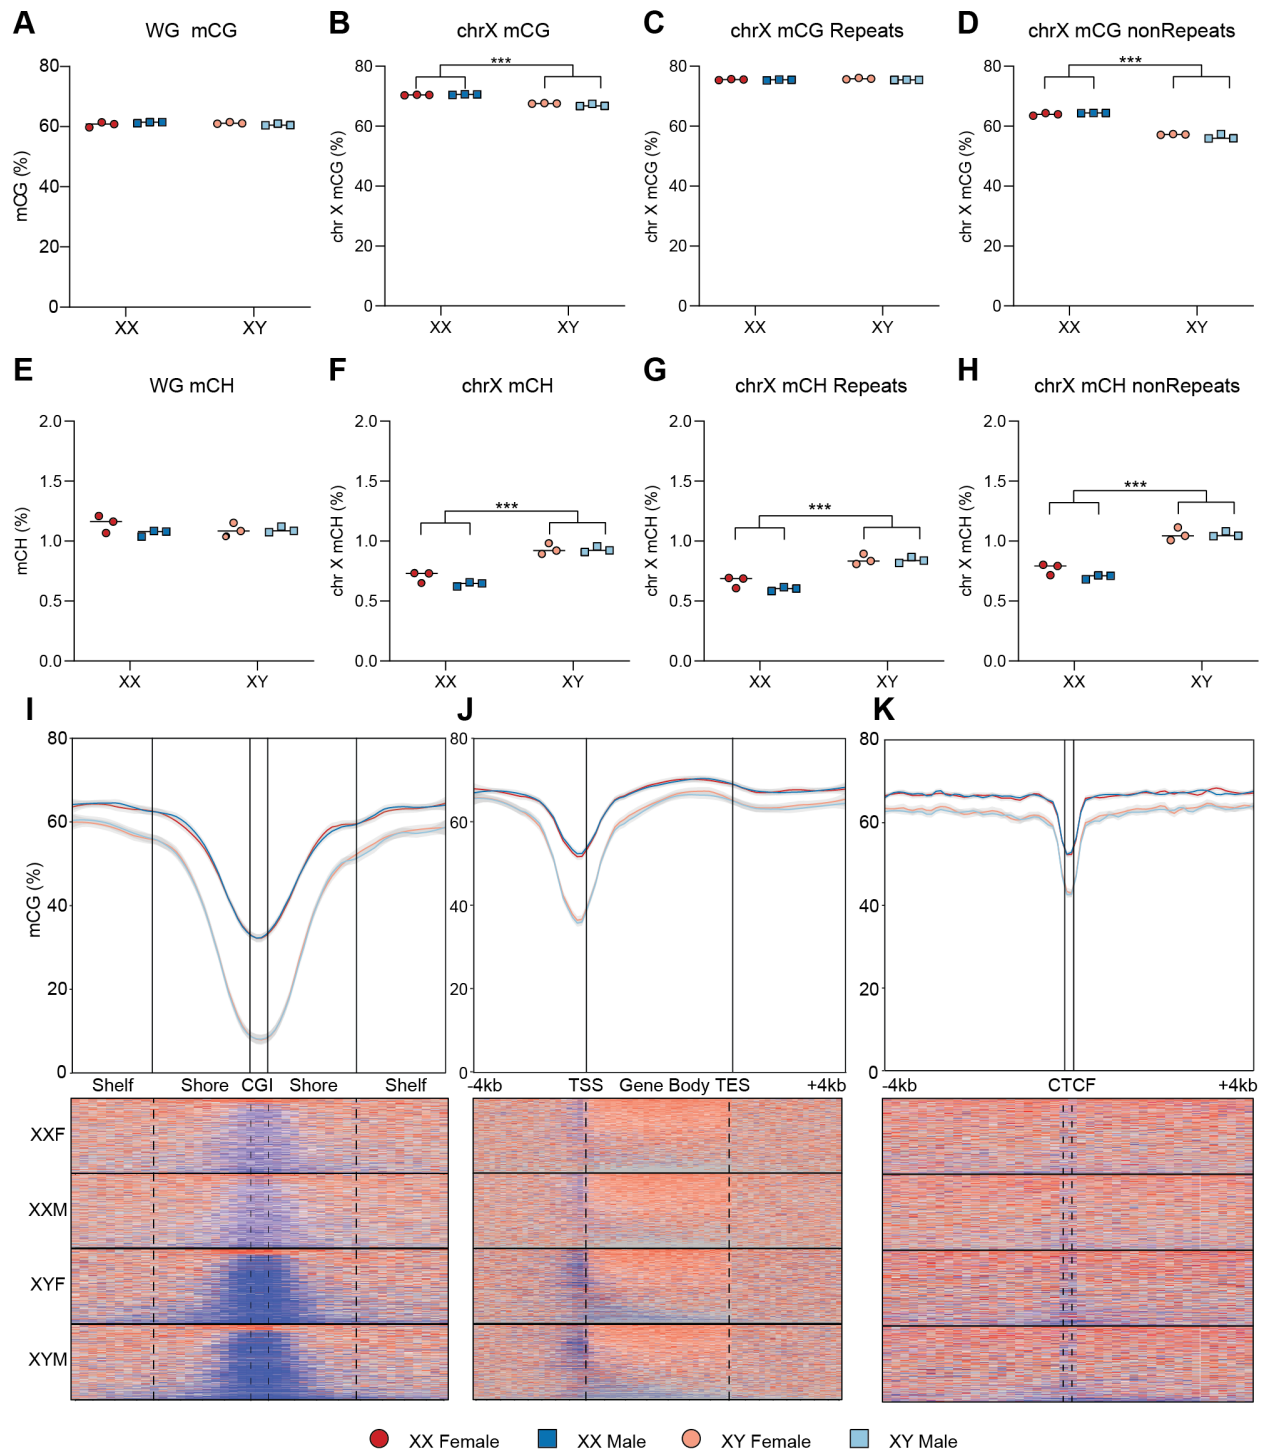

1043

1044 **Figure 3. X chromosome levels of methylation in FCG hippocampus by WGoBS.** DNA was isolated from  
 1045 FCG hippocampi (n=3/group). Methylation in CpG (CG) and non-CpG (CH) contexts was assessed by  
 1046 WGoBS (n=3/group). A) There is no main effect difference in overall whole genome (WG) levels of  
 1047 methylation in CG context (mCG) (Two-way ANOVA). B) XX mice have higher levels of X chromosome mCG  
 1048 than XY mice regardless of gonadal sex (M v. F). The differences in X-chromosome mCG are concentrated  
 1049 in non-repetitive elements, as there is: (C) no difference in mCG in repetitive elements and (D) higher

1050 levels of mCG in XX mice as compared to XY mice regardless of their gonadal sex (M v. F). E) There is no  
1051 main effect difference in overall levels of methylation in non-CpG context (mCH) (Two-way ANOVA). F) XX  
1052 mice have lower mCH than XY mice specifically on the X chromosome, regardless of their gonadal sex (M  
1053 v. F). The differences in X-chromosome mCH are seen in both (E) repetitive and (F) non-repetitive elements  
1054 of the genome. mCG levels were calculated with respect to genic regions by binning 200 nucleotides in  
1055 flanking regions and region-size dependent bins within the genic region (CGI, gene body, and CTCF) as to  
1056 maintain the same number of bins for each feature. The average for all (I) CGI, (J) Gene Body, and (C) CTCF  
1057 were assessed for each of the FCG (XXF, XXM, XYF, XYM) and plotted as averages with 95% CI. I) X-  
1058 chromosome CpG Islands (CGI), shores, and shelves have higher levels of mCG in XX genotypes as  
1059 compared to XY. The greatest difference in mCG is in the CGI. J) X-chromosome gene bodies and flanking  
1060 regions (+/- 4 Kb) have higher levels of mCG in XX genotypes as compared to XY. The greatest difference  
1061 in mCG is upstream of TSS (ie. promoter region). K) X-chromosome CTCF binding sites have higher levels  
1062 of mCG in XX genotypes as compared to XY. The difference in mCG (XX-XY) is greater within the CTCF  
1063 binding site than in flanking regions (+/- 4 Kb).

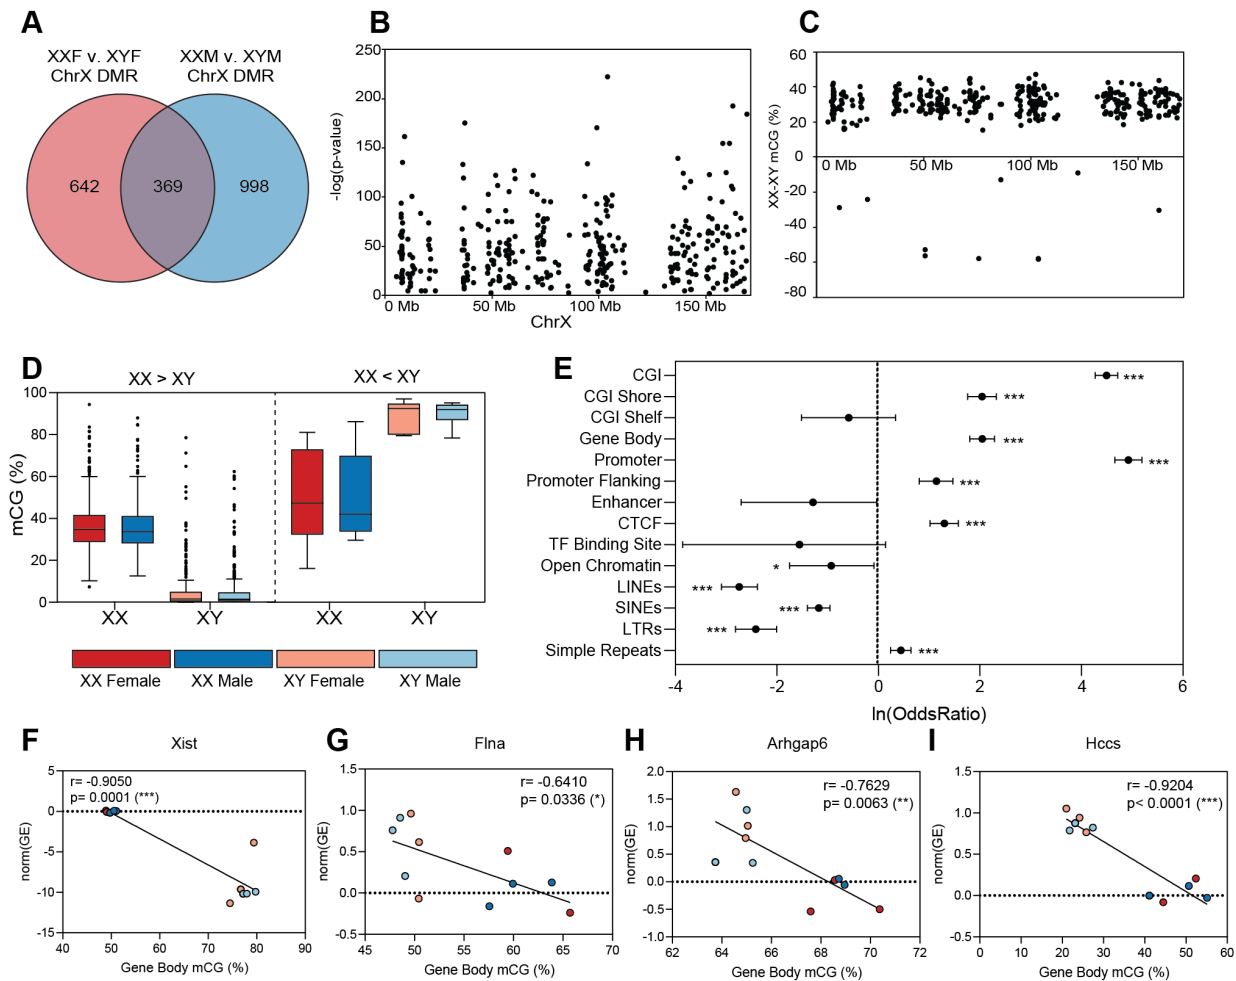

1064

1065 **Figure 4. Epigenomic analysis of X-chromosomal differential methylation from adult FCG**  
 1066 **hippocampi.** X chromosome methylation in CpG (CG) and non-CpG (CH) contexts were assessed by  
 1067 WGoBS (n=3/group). Differentially methylated regions (DMRs) (w=1000) were called in methylKit. Post-  
 1068 hoc Student t-test with Bonferroni correction was done on pairs (XXF v. XYF, XXM v. XYM, XXF v. XXM, XYF  
 1069 v. XYM). A) Intersecting DMRs with significant post-hoc tests for both XX v. XY comparisons (XXF v. XYF  
 1070 and XXM v. XYM) identified 369 DMRs differentially methylated ChrX CpGs by sex chromosome  
 1071 complement. B) Significant DMRs plotted against X-chromosome coordinates show areas densely  
 1072 populated with DMRs and some gaps with no DMRs. C) Most (97.3%) of X-chromosome DMRs have higher  
 1073 mCG in XX than in XY genotypes. D) Distribution of mCG percentages for DMRs with  $XX > XY$  (left) and  $XX$   
 1074  $< XY$  (right) in FCG hippocampi. E) Comparison of X-chromosome DMRs with various genomic elements,  
 1075 show significant enrichment of DMRs in CGIs, CGI Shores, gene bodies, promoters, promoter flanking  
 1076 regions, CTCF binding sites, and simple repeats. X-chromosome DMRs were depleted in repetitive  
 1077 elements: LINEs, SINEs, and LTRs. F-I) Intersection of DMRs within gene bodies with differentially  
 1078 expressed genes by sex chromosome (XX v. XY) identified four genes: (F) *Xist*, (G) *Flna*, (H) *Arhgap6*, and  
 1079 (I) *Hccs*, all of which have a significant negative correlation between gene body methylation and gene  
 1080 expression.

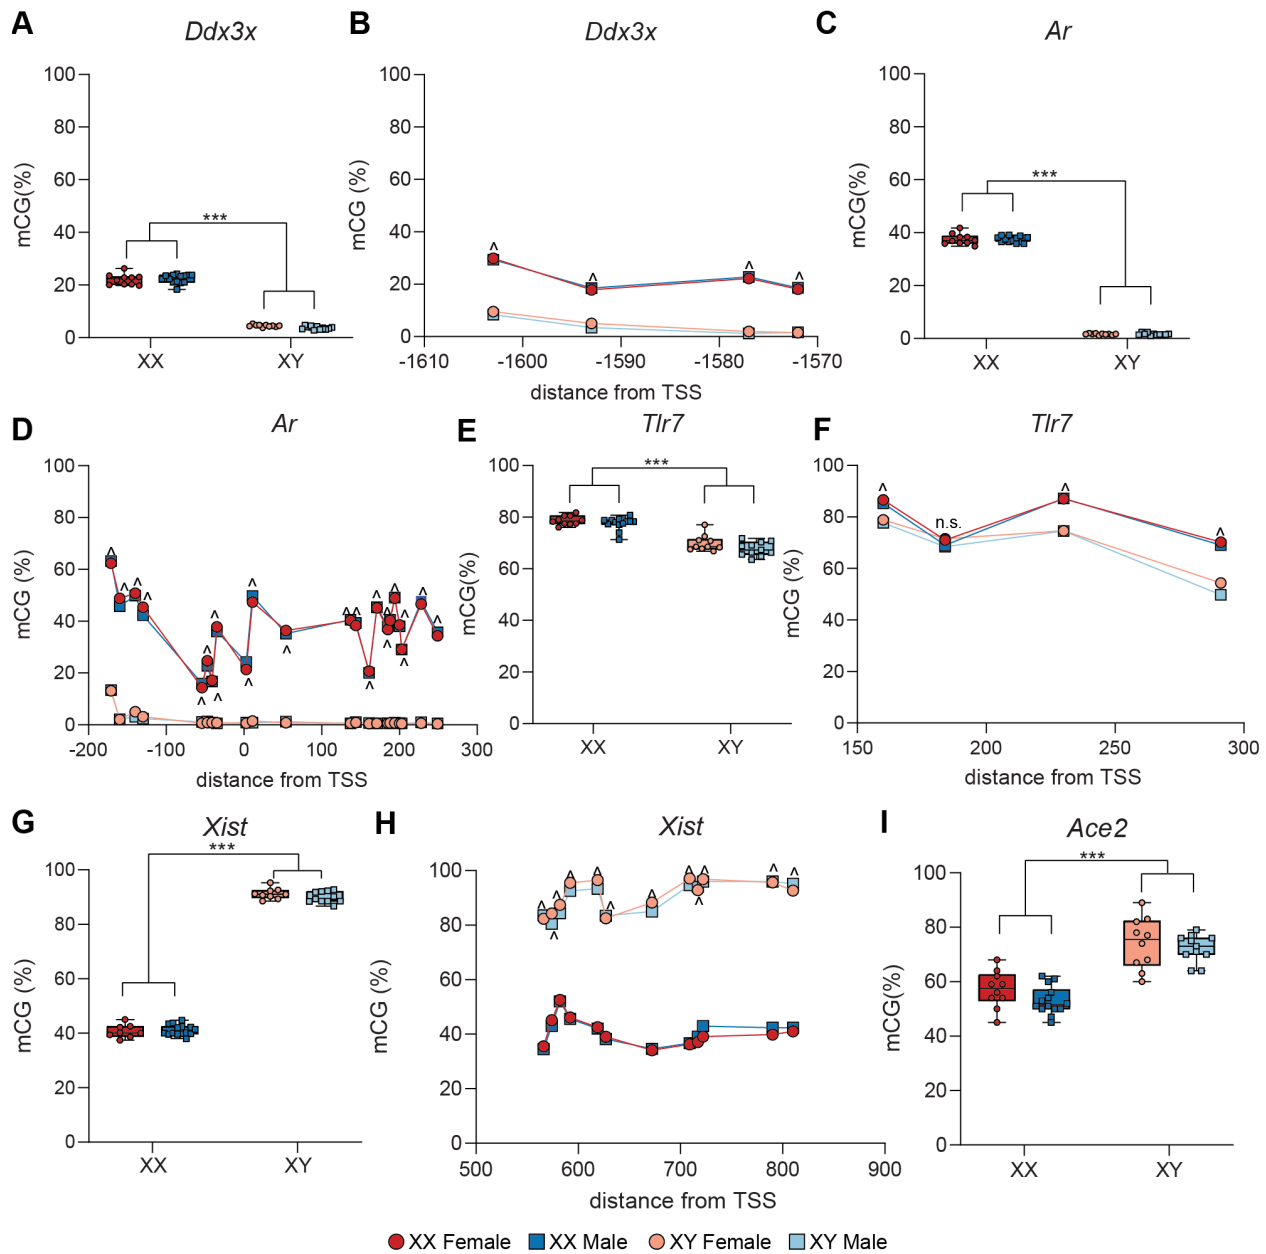

1081

1082 **Figure 5. Targeted bisulfite amplicon sequencing (BSAS) of X-chromosome gene promoters in FCG**  
 1083 **hippocampal DNA.** DNA isolated from FCG hippocampi (n=10-16/group) was bisulfite-converted and DNA  
 1084 methylation in gene promoters (+/- 2kb from TSS) was assessed by BSAS. (A) Average *Ddx3x* promoter  
 1085 mCG is lower in XY genotypes (XYF/XYM) as compared to XX genotypes (XXF/XXM), regardless of gonadal  
 1086 sex. (B) The topography, or patterning, of mCG across the amplified region of the *Ddx3x* promoter shows  
 1087 base-specific regulation of mCG by sex-chromosome complement (XX v. XY), with higher mCG in XX  
 1088 genotypes than XY genotypes at each CG site in the region. (C) Average *Ar* promoter mCG is lower in XY  
 1089 genotypes (XYF/XYM) as compared to XX genotypes (XXF/XXM), regardless of gonadal sex. (D) The  
 1090 topography of mCG across the amplified region of the *Ar* promoter shows base-specific regulation of mCG  
 1091 by sex-chromosome complement (XX v. XY), with higher mCG in XX genotypes than XY genotypes at each  
 1092 CG site in the region. (E) Average *Tlr7* promoter mCG is lower in XY genotypes (XYF/XYM) as compared to

1093 XX genotypes (XXF/XXM), regardless of gonadal sex. (F) The topography of mCG across the amplified  
1094 region of the *Tlr7* promoter shows base-specific regulation of mCG by sex-chromosome complement (XX  
1095 v. XY), with higher mCG in XX genotypes than XY genotypes at three of the four CG sites in the region. (G)  
1096 Average *Xist* promoter mCG is higher in XY genotypes (XYF/XYM) as compared to XX genotypes (XXF/XXM),  
1097 regardless of gonadal sex. (H) The topography of mCG across the amplified region of the *Xist* promoter  
1098 shows base-specific regulation of mCG by sex-chromosome complement (XX v. XY), with higher mCG in  
1099 XY genotypes than XX genotypes at each CG site in the region. (I) Average *Ace2* promoter mCG is higher  
1100 in XY genotypes (XYF/XYM) as compared to XX genotypes (XXF/XXM), regardless of gonadal sex.

1101 **Boxplots** represent median, interquartile range, and minimum/maximum mCG (%) averaged over all CG  
1102 sites within the amplified region of the respective gene promoter. (2way ANOVA, main effect of sex-  
1103 chromosome complement (XX v. XY), \*\*\* $p < 0.001$ ) (2way ANOVA, Tukey's posthoc,  $\wedge p < 0.05$  for all four  
1104 XX v XY comparisons: XXF v XYF, XXF v. XYM, XXM v. XYM, XXM v. XYF)

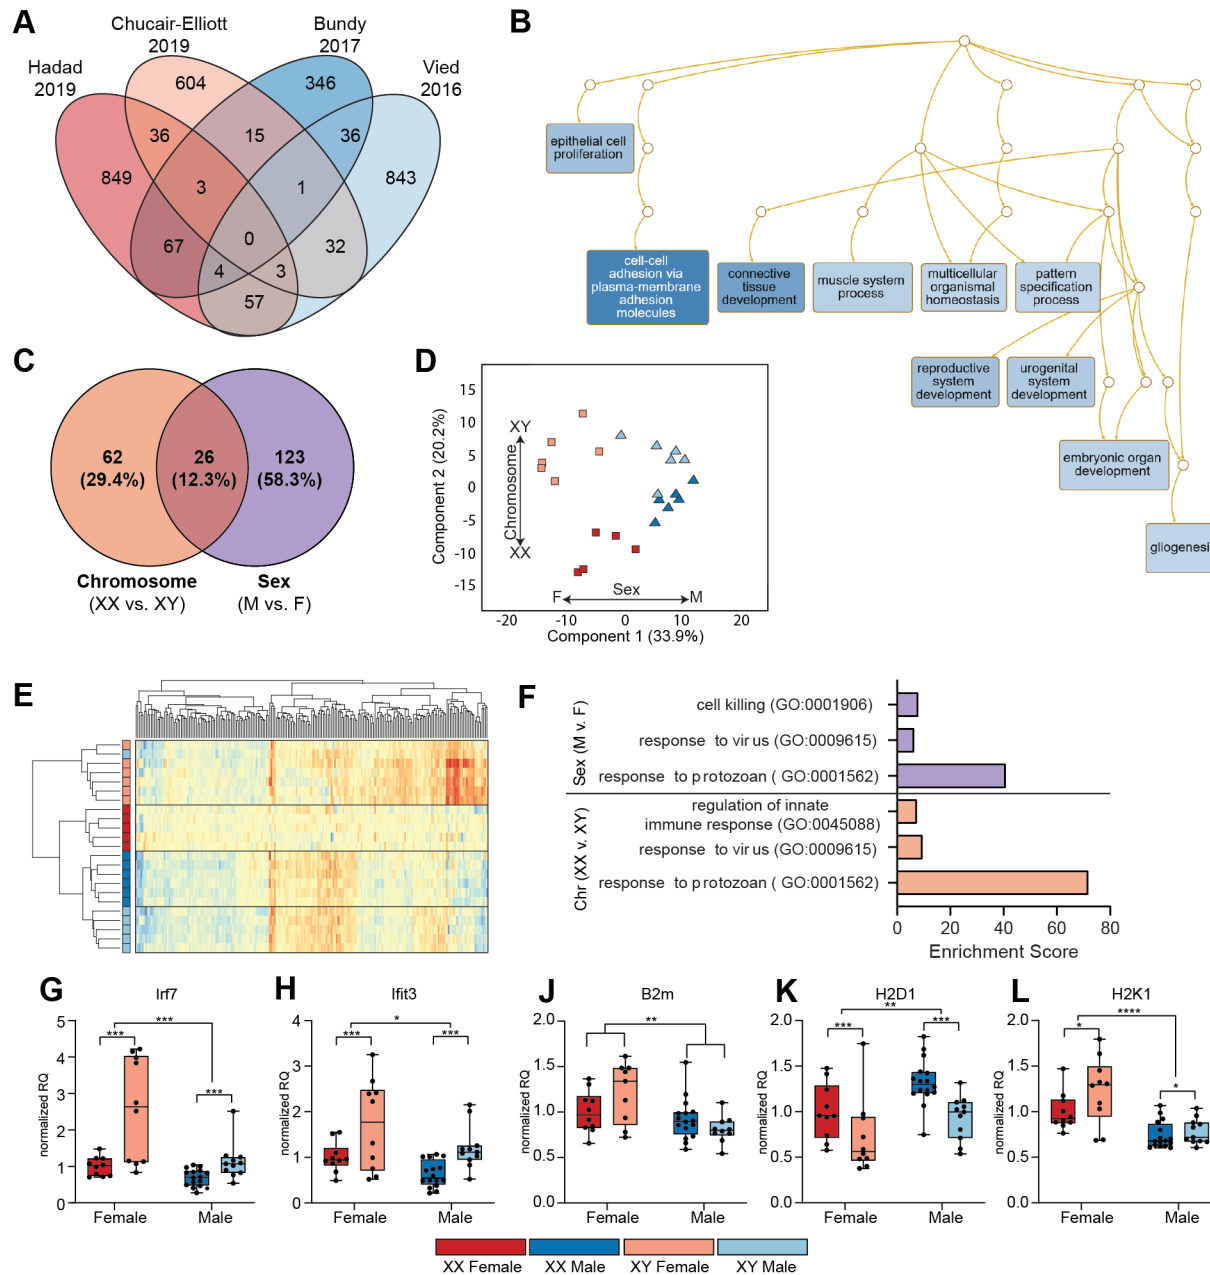

1105

1106 **Figure 6. Transcriptomic analysis of autosomal differential expression from adult FCG hippocampi.** DNA  
 1107 and RNA were isolated from FCG hippocampi (n=10-16/group). mRNA expression was assessed by  
 1108 stranded RNA-Seq (n=5-6/group) and RT-qPCR (n=10-16/group). Results were compared to previously  
 1109 published hippocampal transcriptomic sex differences. **Boxplots** represent median, interquartile range,  
 1110 and minimum/maximum normalized RQ. A) Comparison of four previous hippocampal transcriptomic  
 1111 studies (Supplemental Table 2), shows 2896 autosomal-encoded sex differences in wild-type mice across  
 1112 all studies with no genes in common between all studies. B) GO Biological Process Over-Representation  
 1113 Analysis (ORA) of the autosomal sex differences identified in previous studies revealed 10 major pathways  
 1114 differentially regulated by sex in the mouse hippocampus (Supplemental Table 3). C) Differential  
 1115 expression analysis of FCG hippocampal RNA-Seq libraries identified 211 differentially expressed  
 1116 autosomal genes, 62 had a main effect of chromosome only (XX v. XY), 123 had a main effect of sex only



1117 (M v. F) and 26 genes had main effects of chromosome and sex. D) Principal component analysis of  
1118 differentially expressed autosomal genes showed separation of sex (M v. F) in the first component (33.9%)  
1119 and separation of the chromosome (XX v. XY) in the second component (20.2%). E) Hierarchical clustering  
1120 of differentially expressed autosomal genes shows separation of genotypes by sex and sex chromosome  
1121 complement. F) ORA of the autosomal sex differences identified in the FCG hippocampus revealed 4  
1122 pathways (Supplemental Table 3) differentially regulated by sex chromosome complement and/or  
1123 gonadal sex. G-L) Differential expression of select genes was confirmed by RT-qPCR (n=10-16/group, Two-  
1124 Way ANOVA, main effect of sex chromosome complement (XX v. XY) or gonadal sex (M v. F), \*p<0.05,  
1125 \*\*p<0.01, and \*\*\*p<0.001).

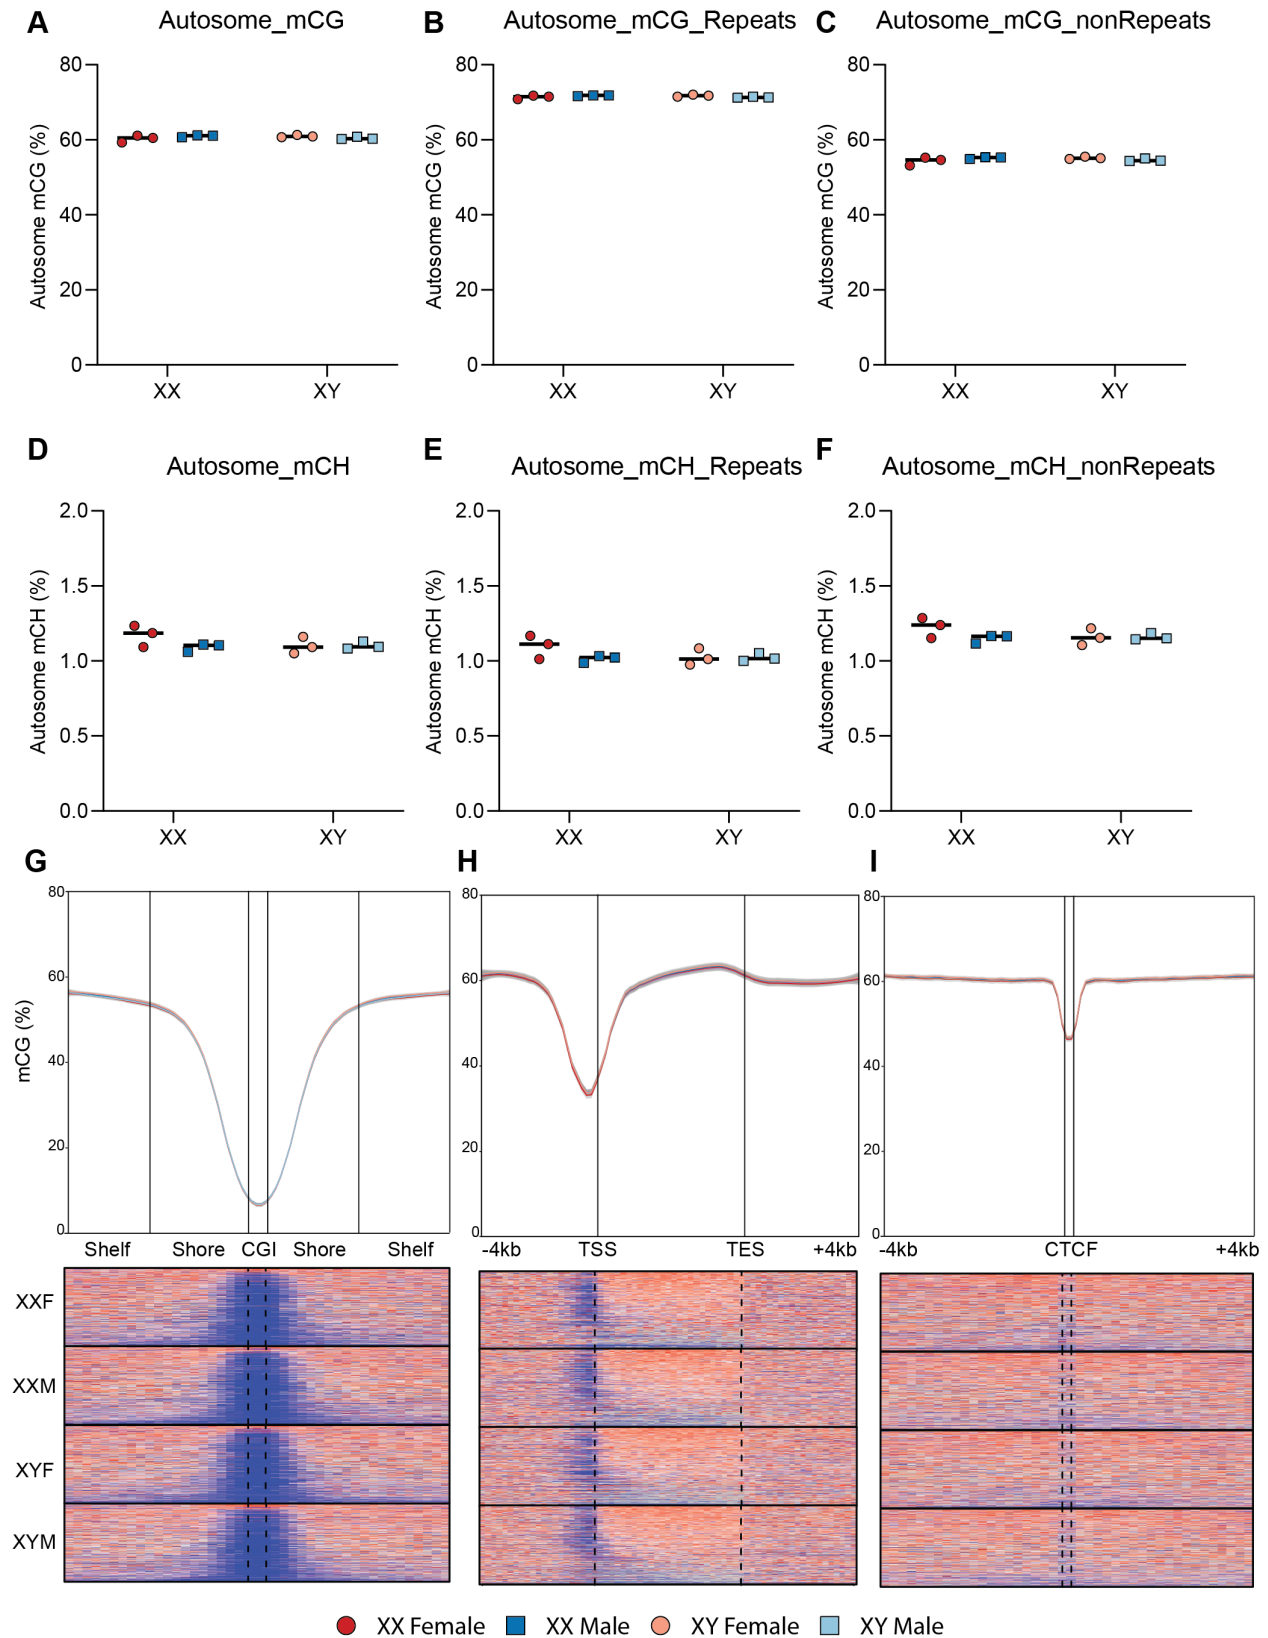

1127 **Figure 7. Autosomal chromosome levels of methylation in FCG hippocampus by WGoBS.** DNA and RNA  
1128 were isolated from FCG hippocampi (n=10-16/group). Autosomal methylation in CpG (CG) and non-CpG  
1129 (CH) contexts were assessed by WGoBS (n=3/group). A) There is no difference in overall mCG on  
1130 autosomes, in either (B) Repetitive or (C) Non-repetitive elements. D) There is no difference in overall  
1131 mCH on autosomes in either (E) Repetitive or (F) Non-repetitive elements (Two-way ANOVA). G-I) There  
1132 is no difference in autosomal mCG in: (G) CpG Islands (CGI), shores, and shelves; (H) gene bodies and  
1133 flanking regions (+/- 4 Kb); or (I) CTCF binding sites and flanking regions (+/- 4 Kb).

1134

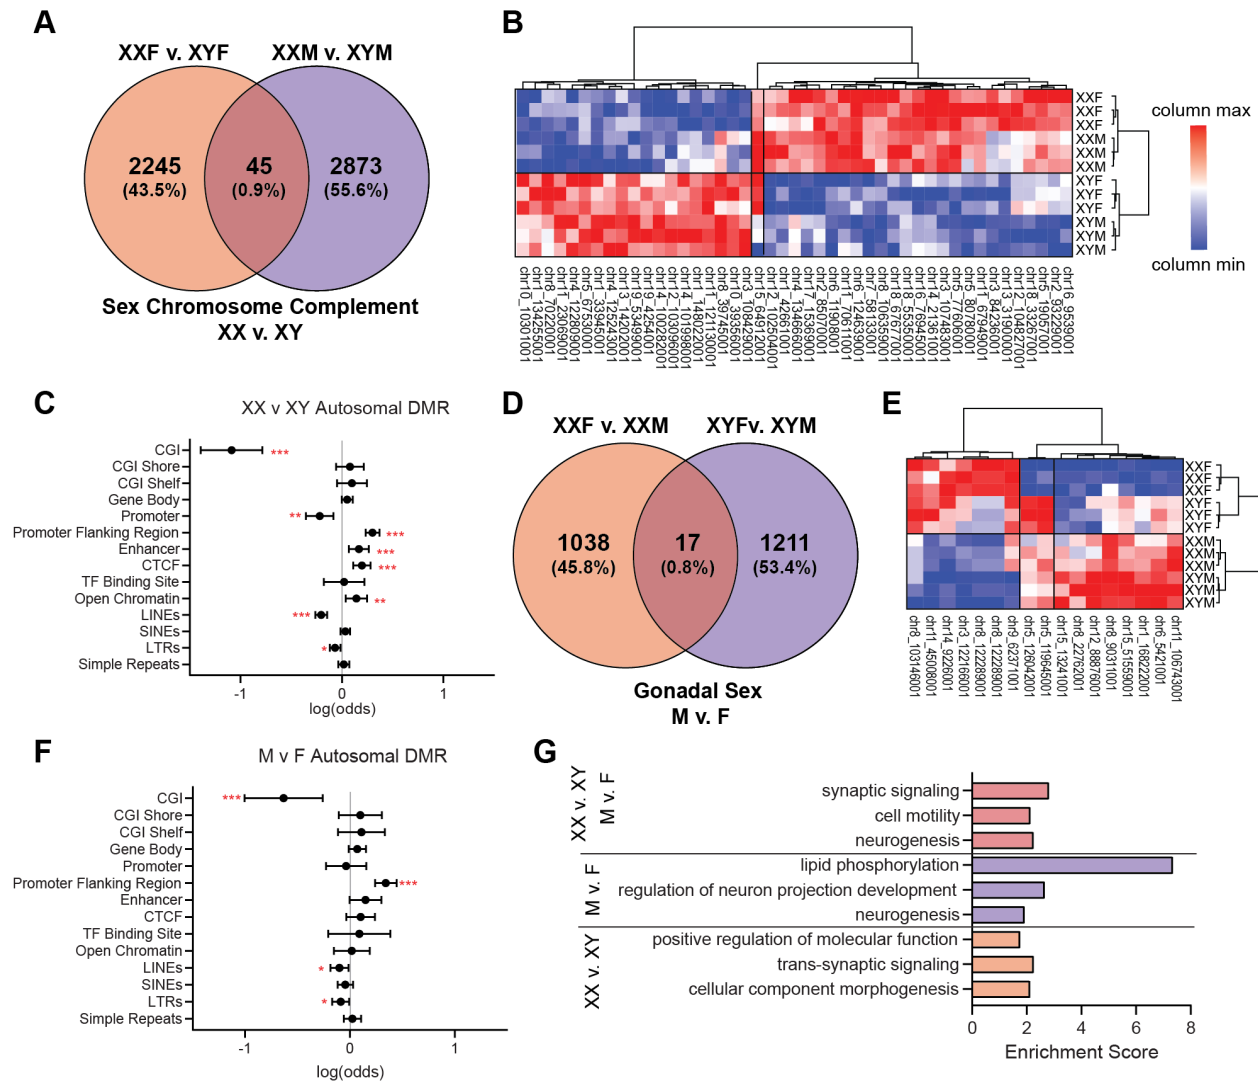

1135

1136 **Figure 8. Epigenomic analysis of autosomal differential methylation from adult FCG hippocampi.**

1137 Autosomal methylation in CpG (CG) context was assessed by WGoXBS (n=3/group). Differentially  
 1138 methylated regions (DMRs) (w=1000 bp) were called in methylKit. Post-hoc pairwise Student t-test with  
 1139 Bonferroni correction (XXF v. XYF, XXM v. XYM, XXF v. XXM, XYF v. XYM;  $p < \alpha = 0.0125$ ). A) Intersecting  
 1140 significant DMRs for both XX v. XY comparisons (XXF v. XYF and XXM v. XYM) identified 47 DMRs  
 1141 differentially methylated autosomal CpGs by sex chromosome complement. B) Heatmap of sex  
 1142 chromosomally-regulated DMRs. C) Comparison of sex chromosomally regulated autosomal DMRs with  
 1143 various genomic elements, show significant depletion of autosomal DMRs in: CGIs, promoters, LINES, and  
 1144 LTRs. Sex-chromosomally regulated DMRs were enriched in: promoter flanking regions, enhancers, CTCF  
 1145 binding sites, and open chromatin. D) Intersecting DMRs with significant post-hoc tests for both M v. F  
 1146 comparisons (XXF v. XXM and XYF v. XYM) identified 17 DMRs differentially methylated by gonadal sex. E)  
 1147 Heatmap of gonadal sex-regulated DMRs. F) Comparison of gonadal sex-regulated autosomal DMRs with  
 1148 various genomic elements, show significant depletion of DMRs in: CGIs, LINES, and LTRs. Gonadal sex-  
 1149 regulated DMRs were enriched in: promoter flanking regions. G) Genes closest to DMRs were over-  
 1150 represented in GO biological process associated with neuronal functions.

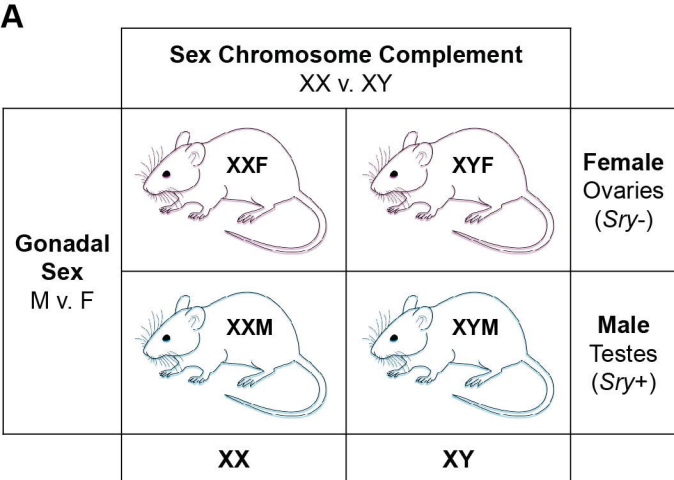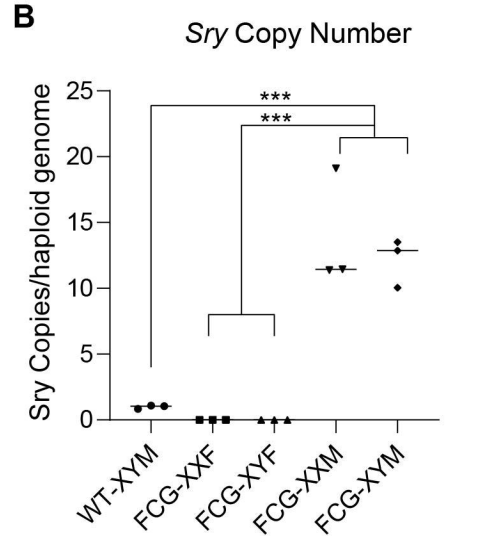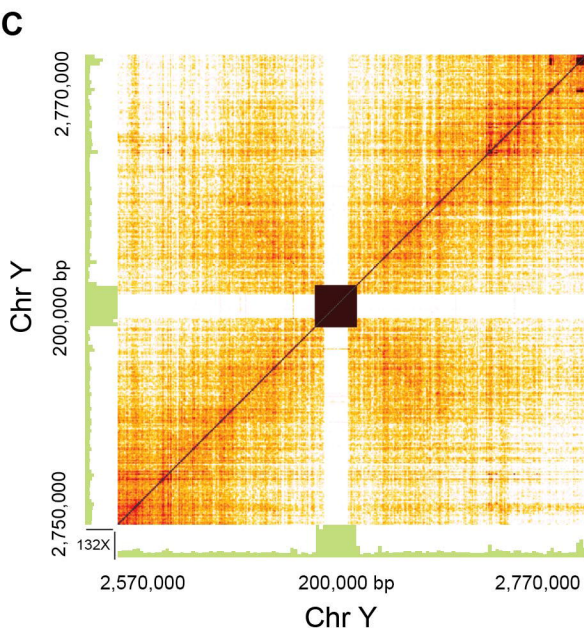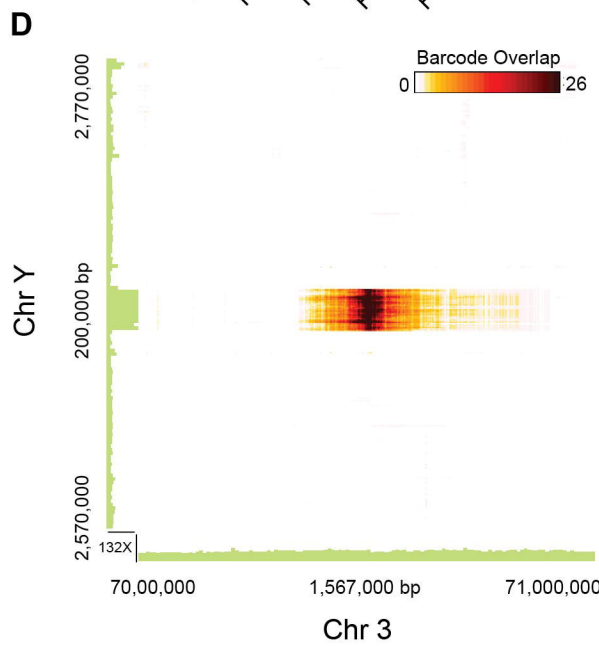

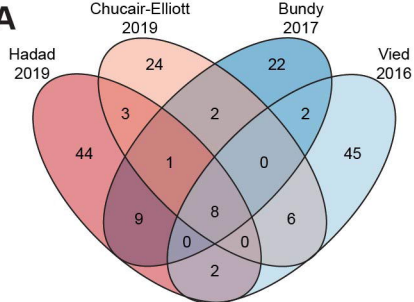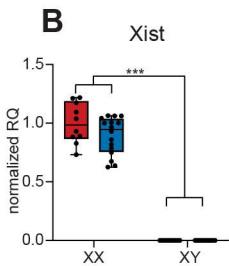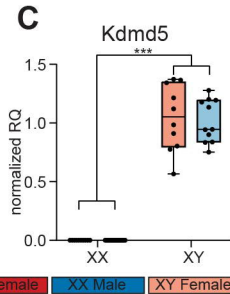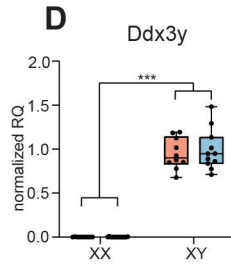

XX Female XX Male XY Female XY Male

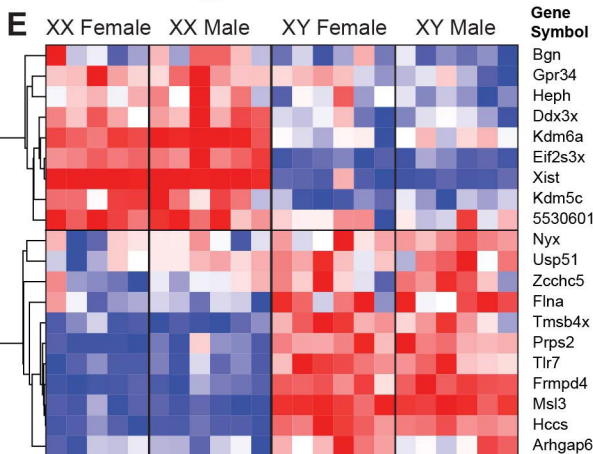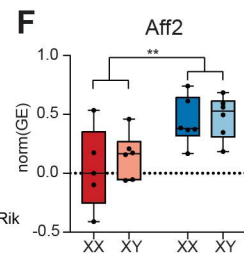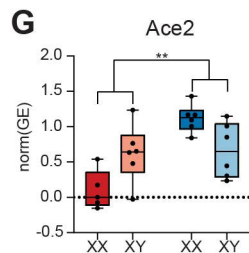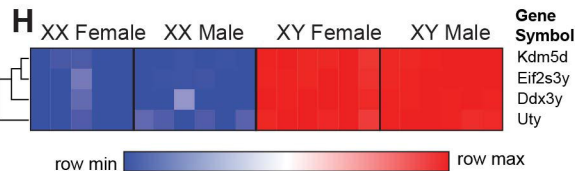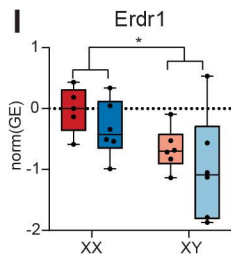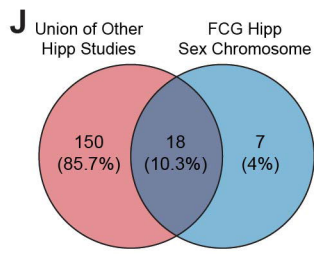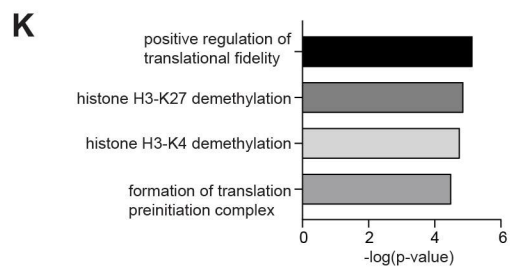

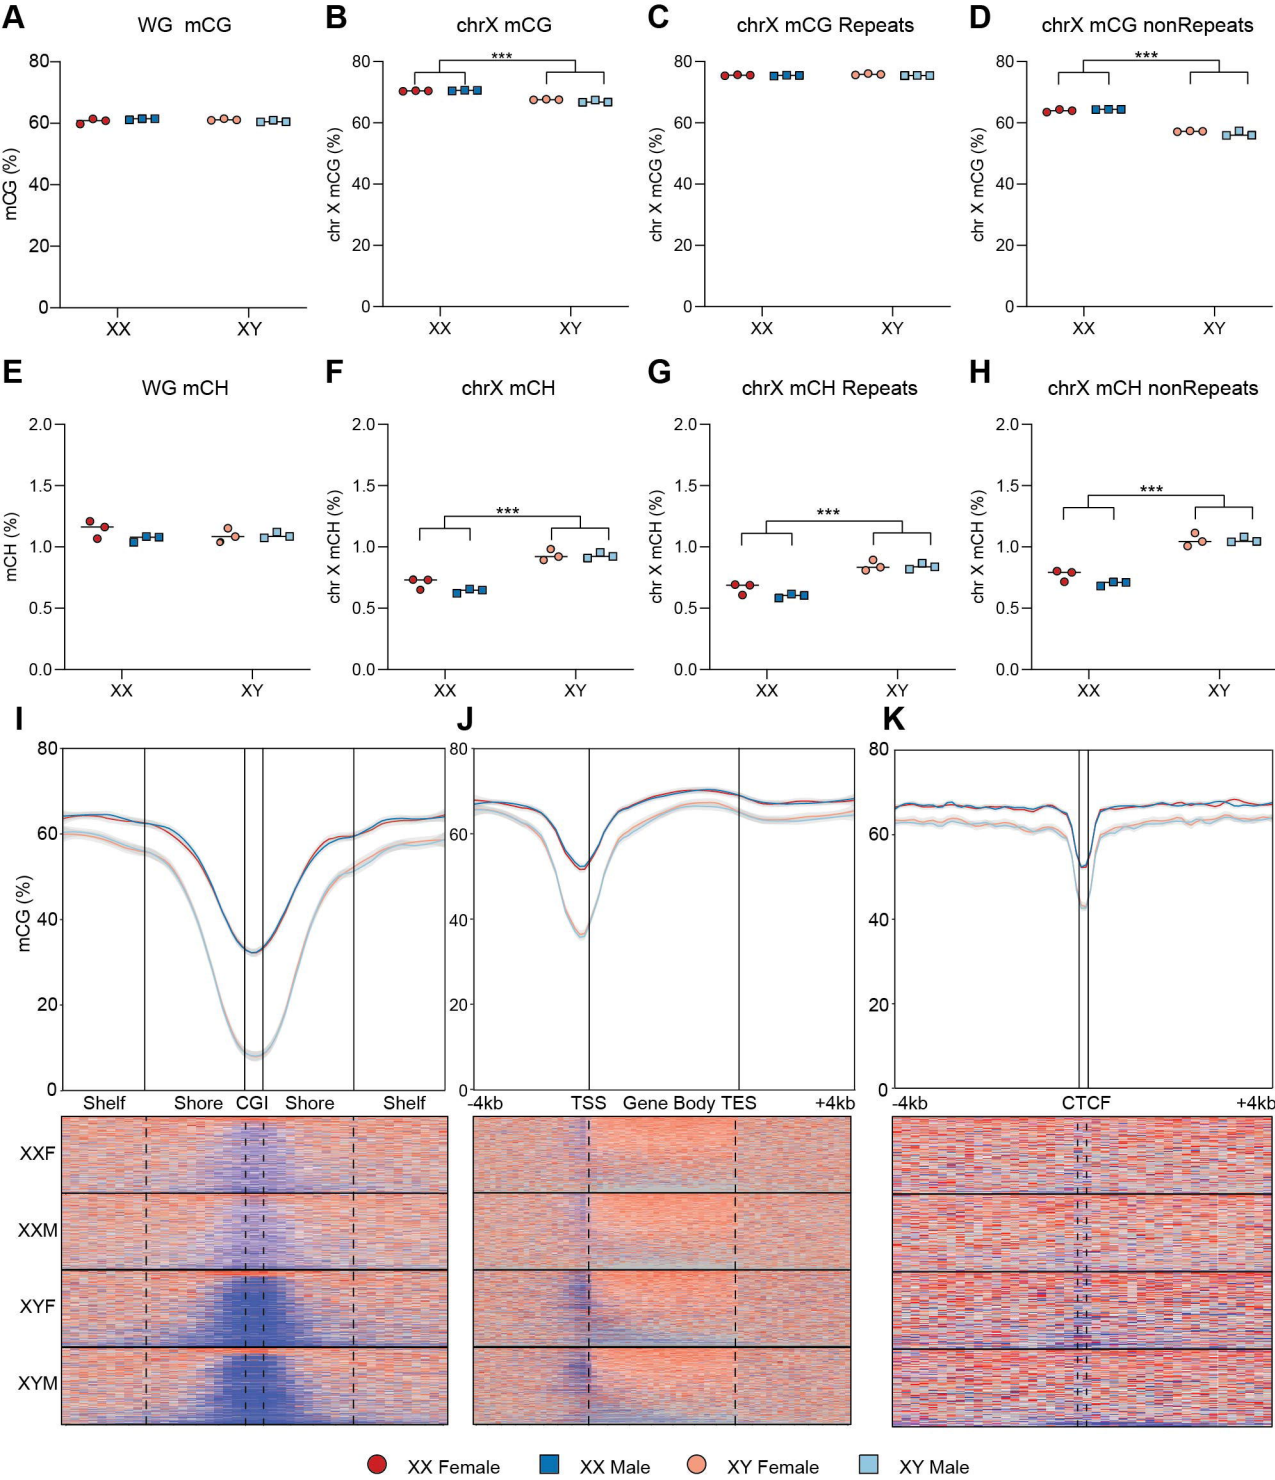

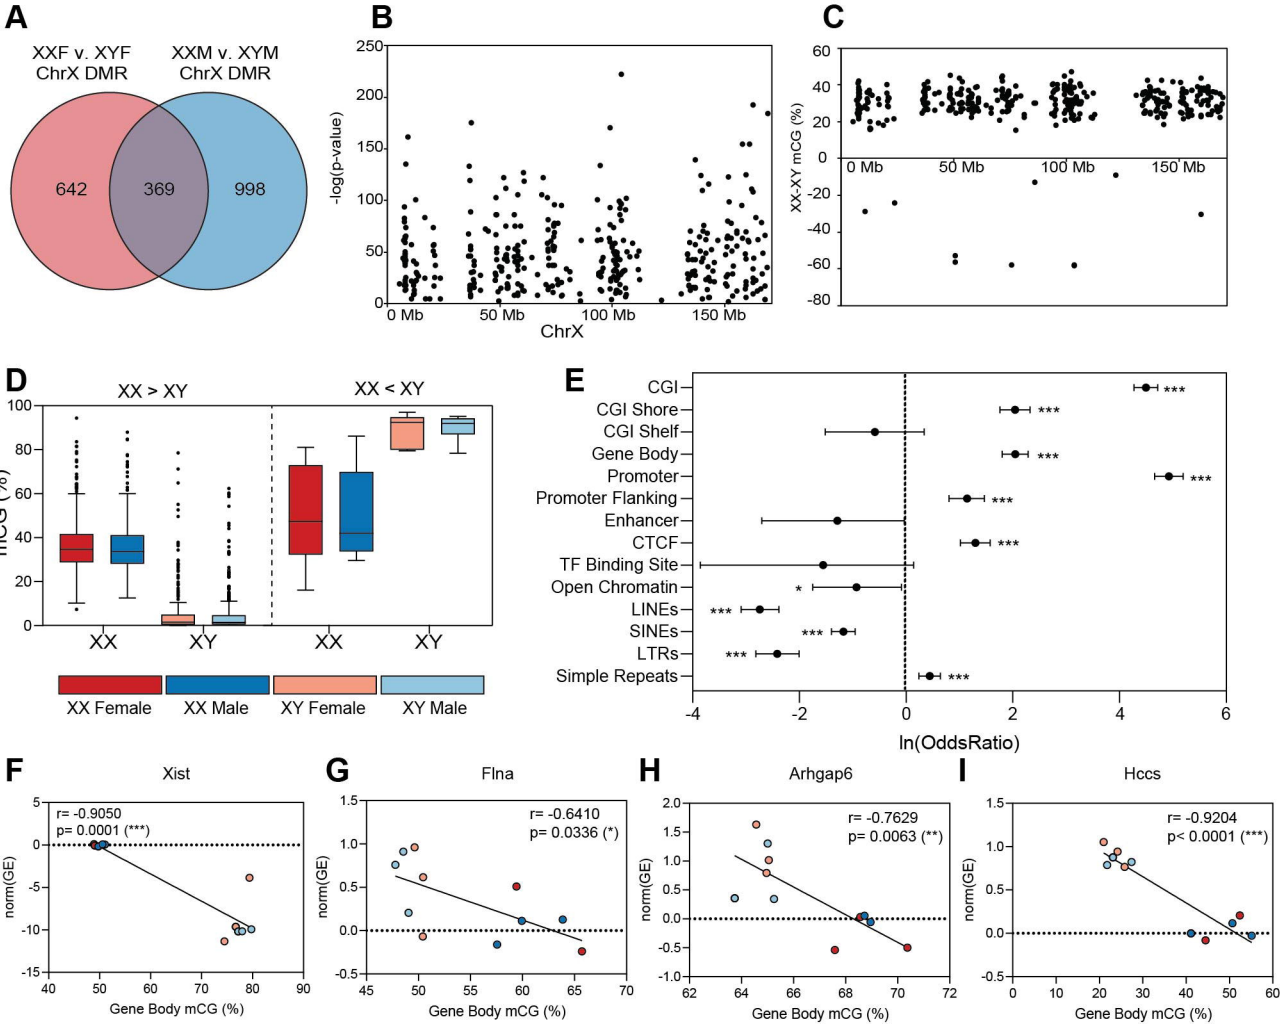



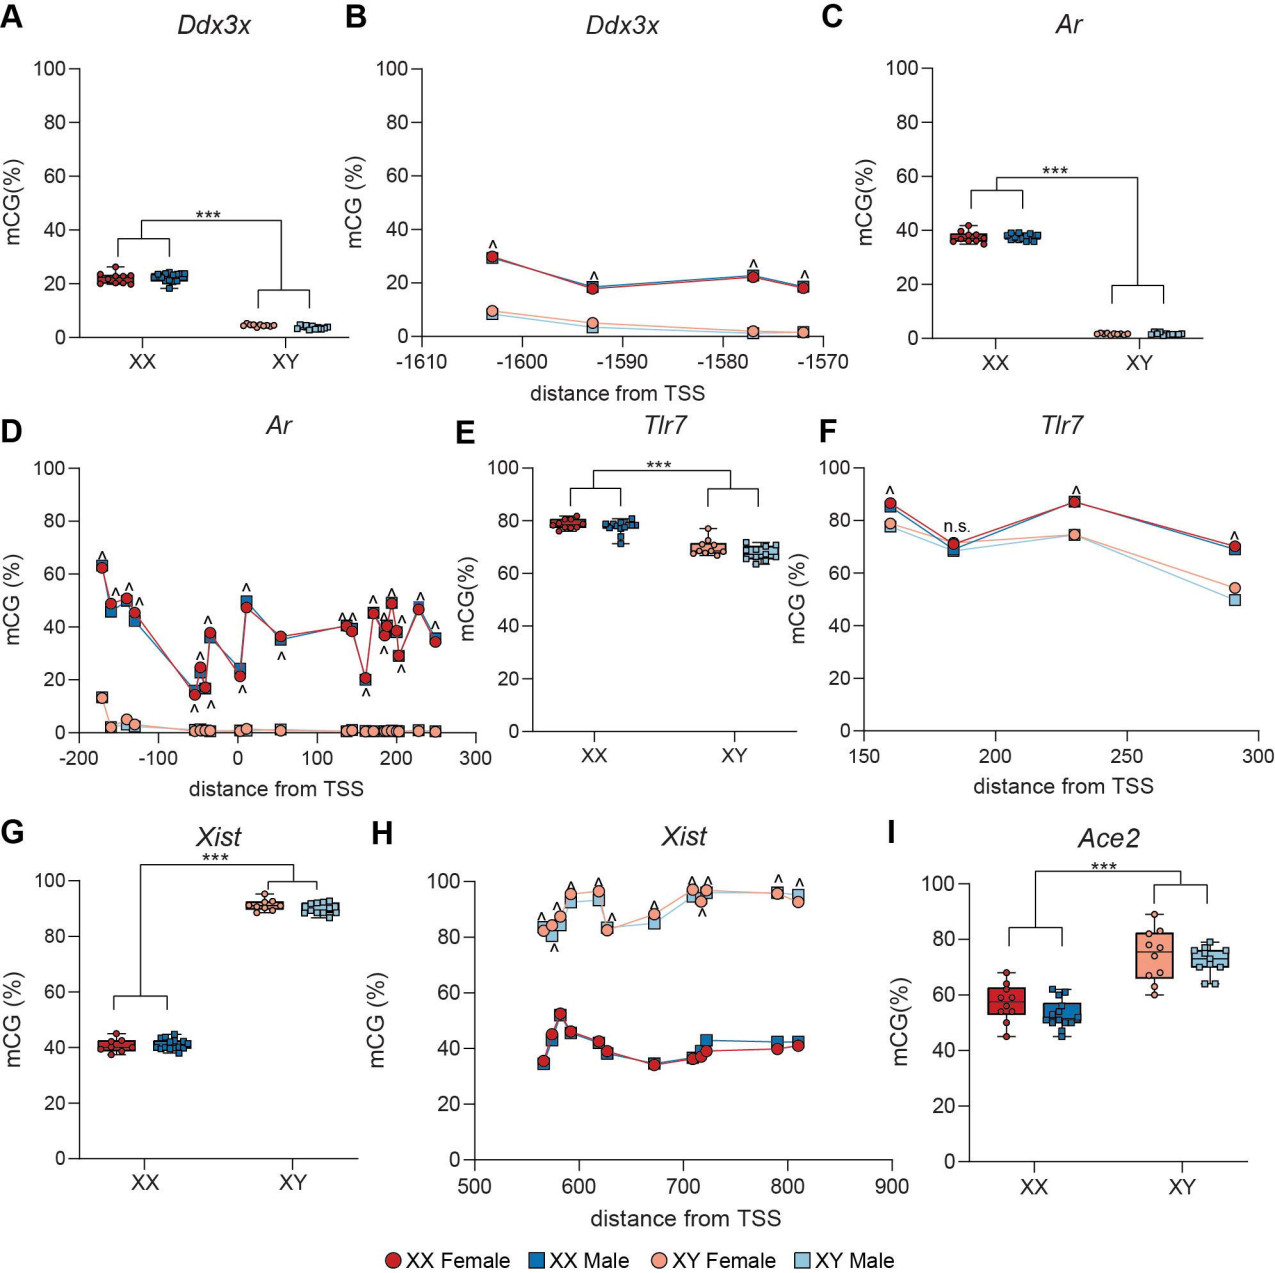

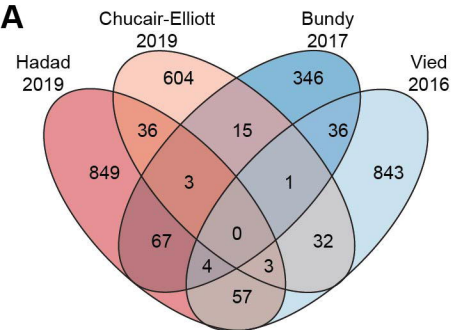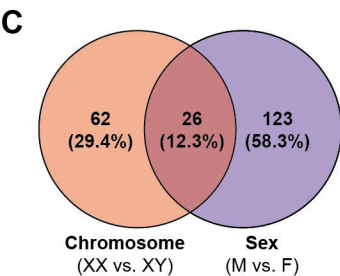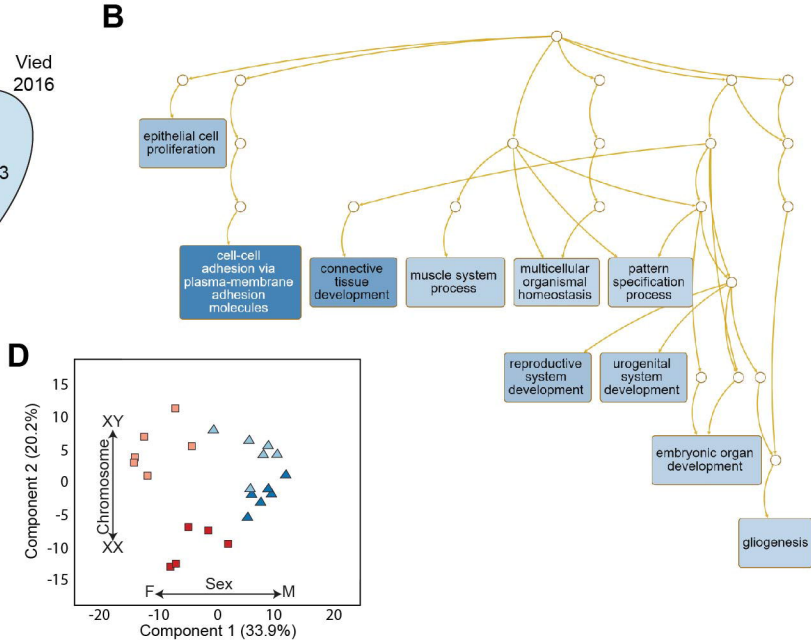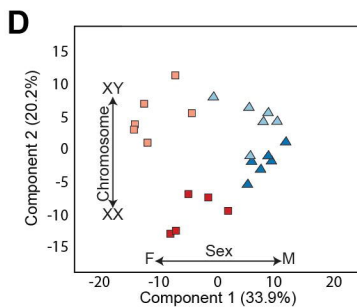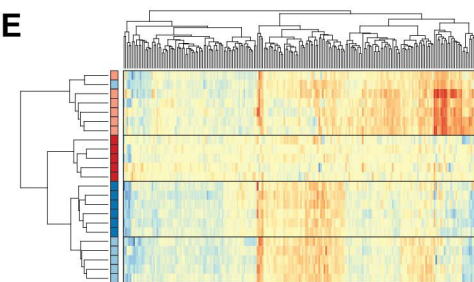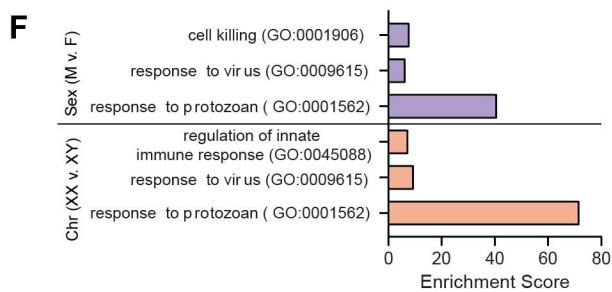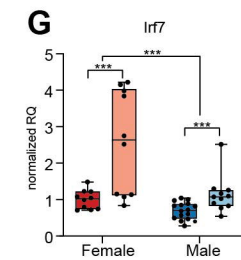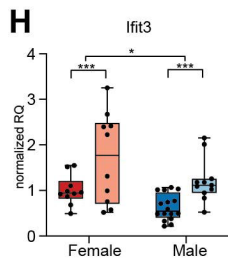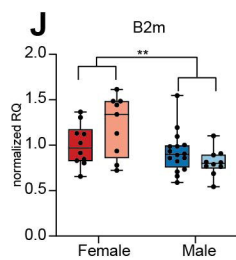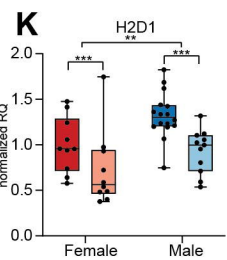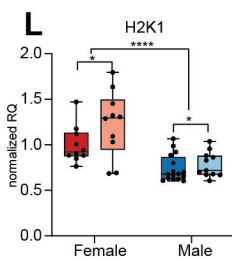

XX Female

XX Male

XY Female

XY Male

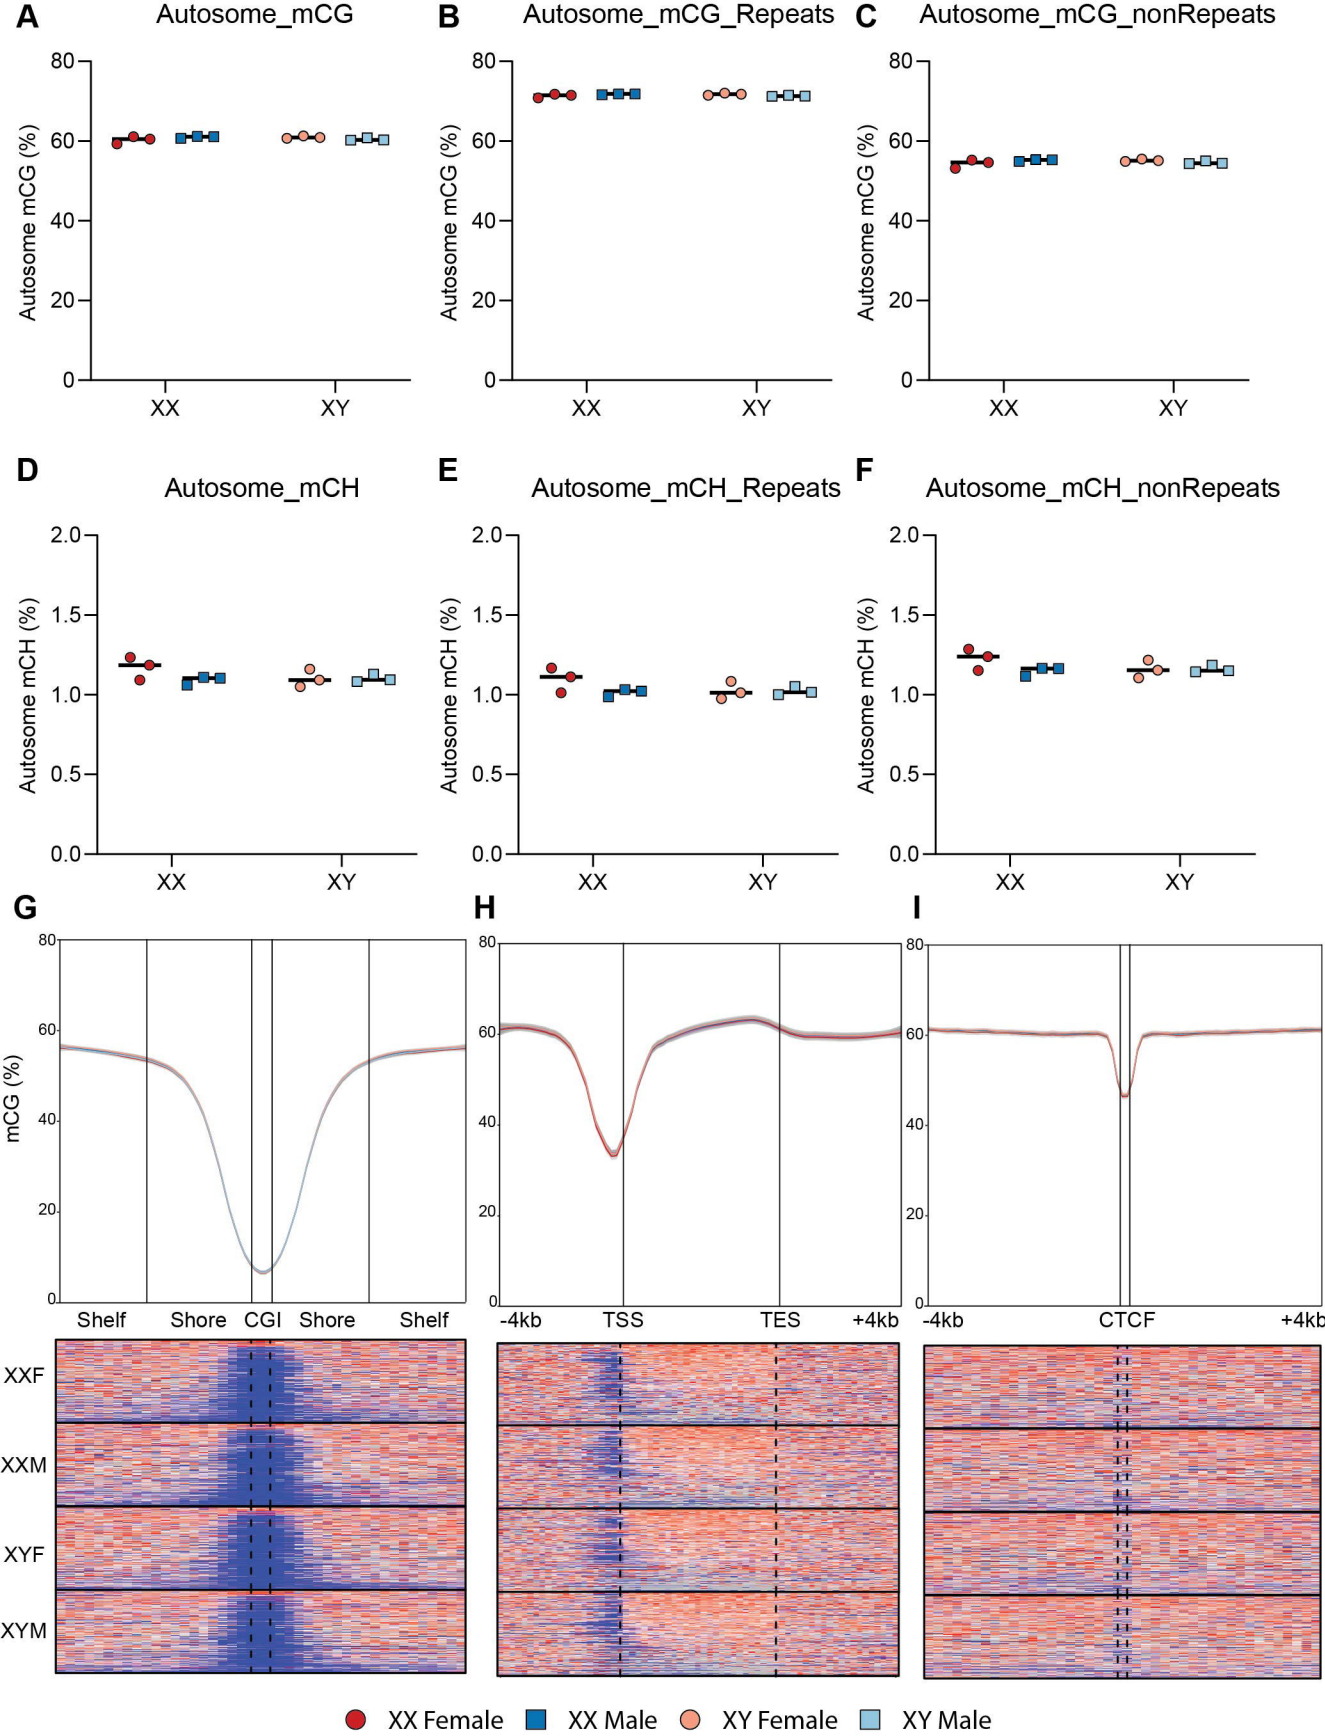

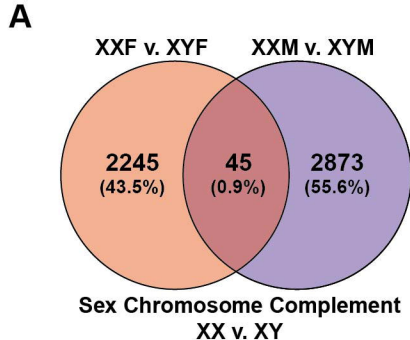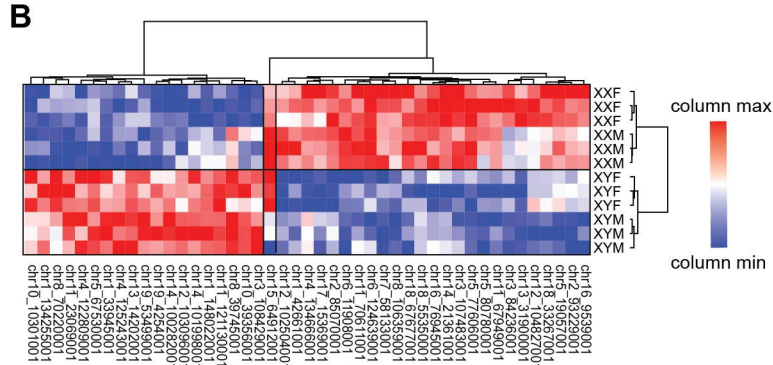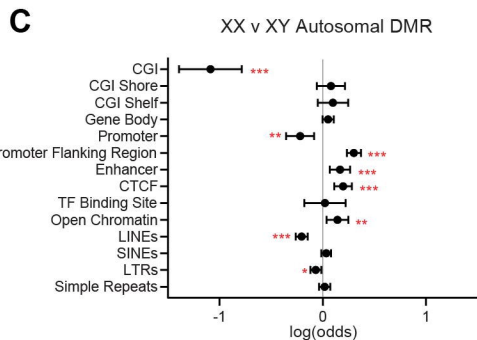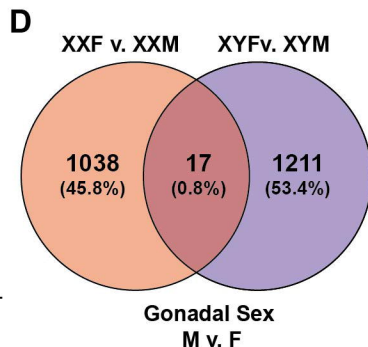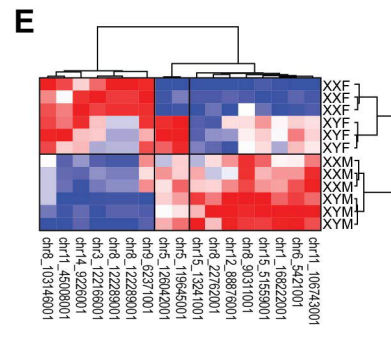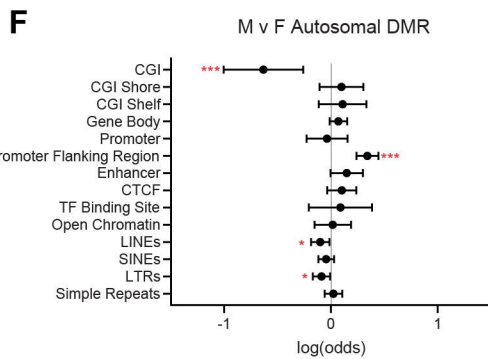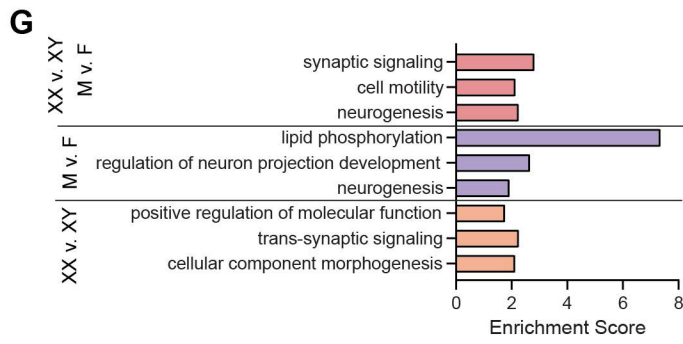

Source: https://www.biorxiv.org/content/10.1101/2021.09.01.458115v1.full.pdf
